# Supplementary material for: A Preliminary Report of Network Electroencephalographic Measures in Primary Progressive Apraxia of Speech and Aphasia
Source: Brain Sci. 2022 Mar 12;12(3):378. doi: 10.3390/brainsci12030378 (PMC8946002; doi:10.3390/brainsci12030378)

Figure S1: *Correlation scatter plots between graph theory and behavioral measures, with individual data points indicating frequency band and group membership.*

*Note:* Duration = disease duration (from symptom onset; years); Age at exam (years); MoCA = score of Montreal Cognitive Assessment (maximum score 30); UPDRS-III = Movement Disorder Society-Unified Parkinson's Disease Rating Scale III (Motor Examination, maximum score 72); ASRS-3 = Apraxia of Speech Rating Scale- version 3 (maximum score 52); WAB- AQ Western Aphasia Battery (Revised) Aphasia Quotient (maximum score 100).

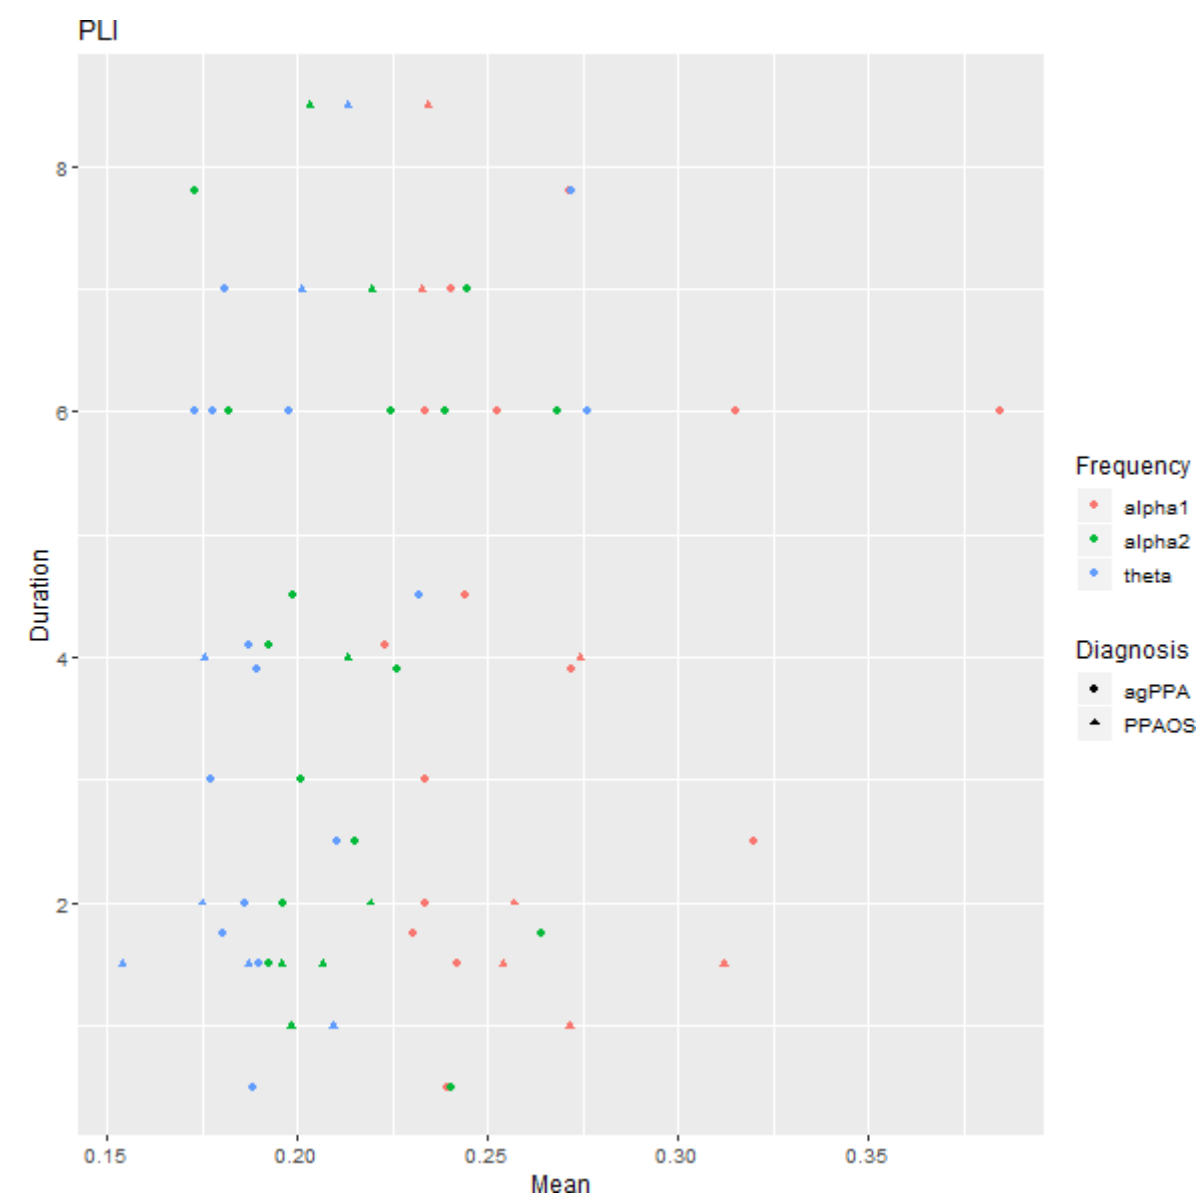

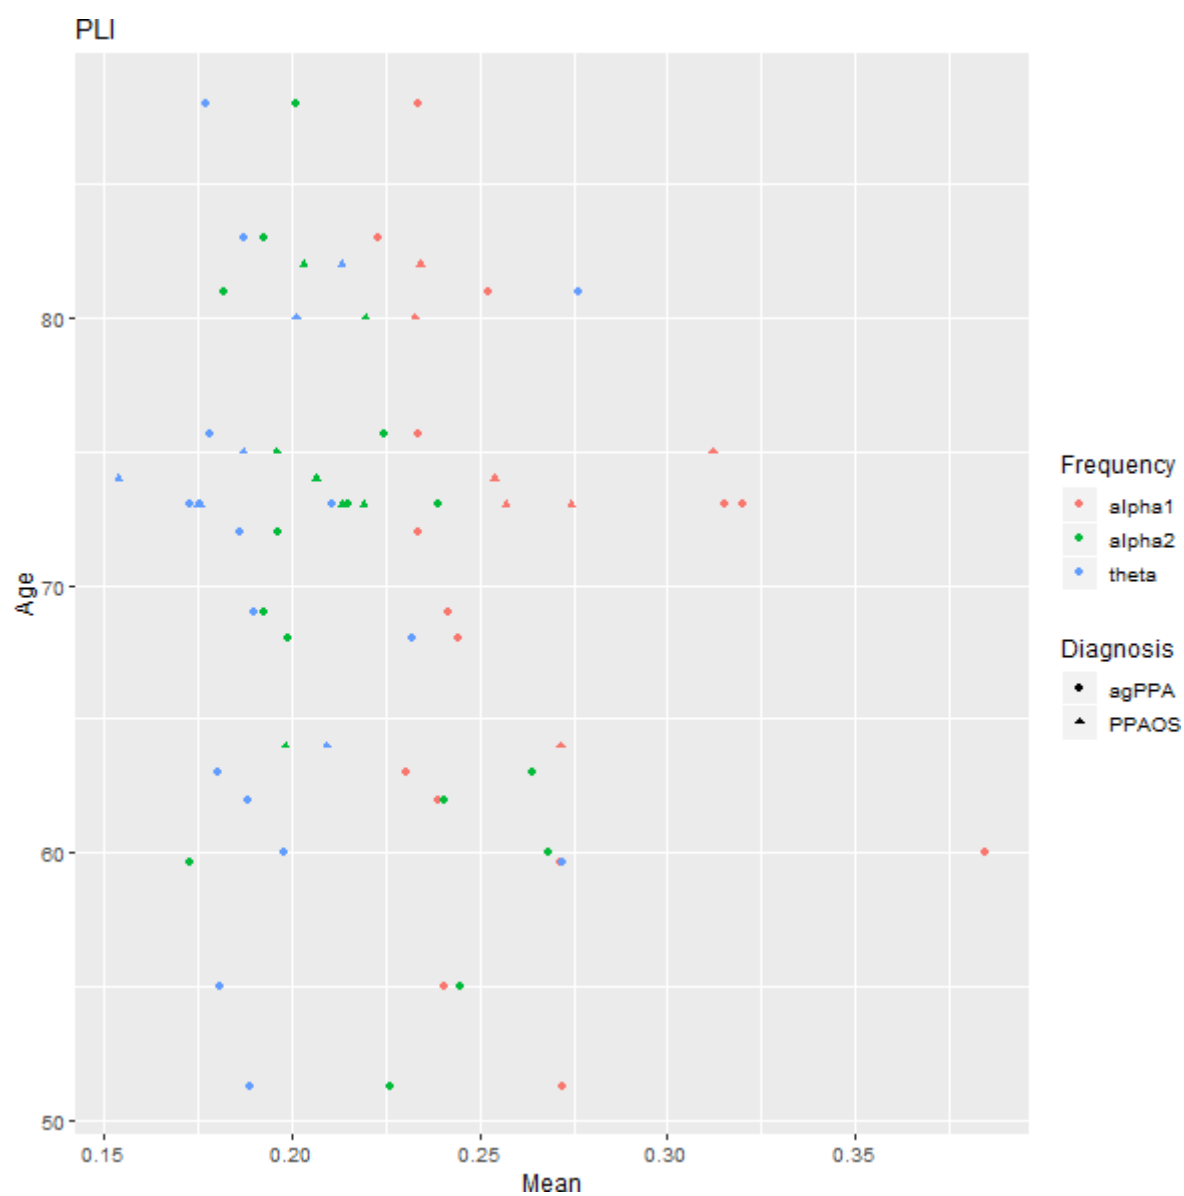

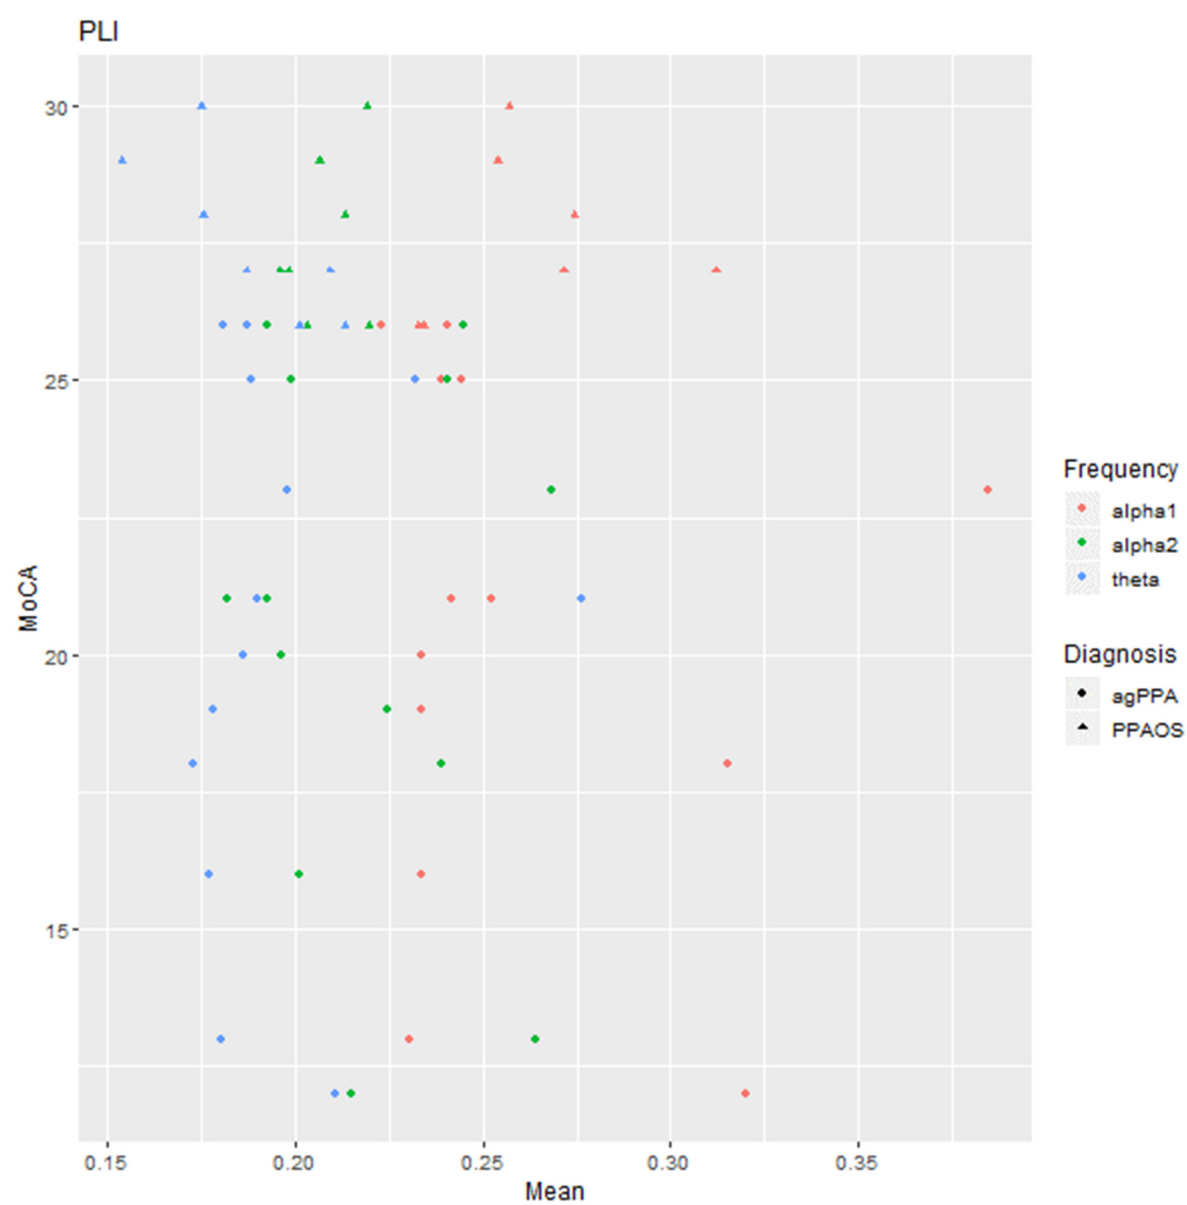

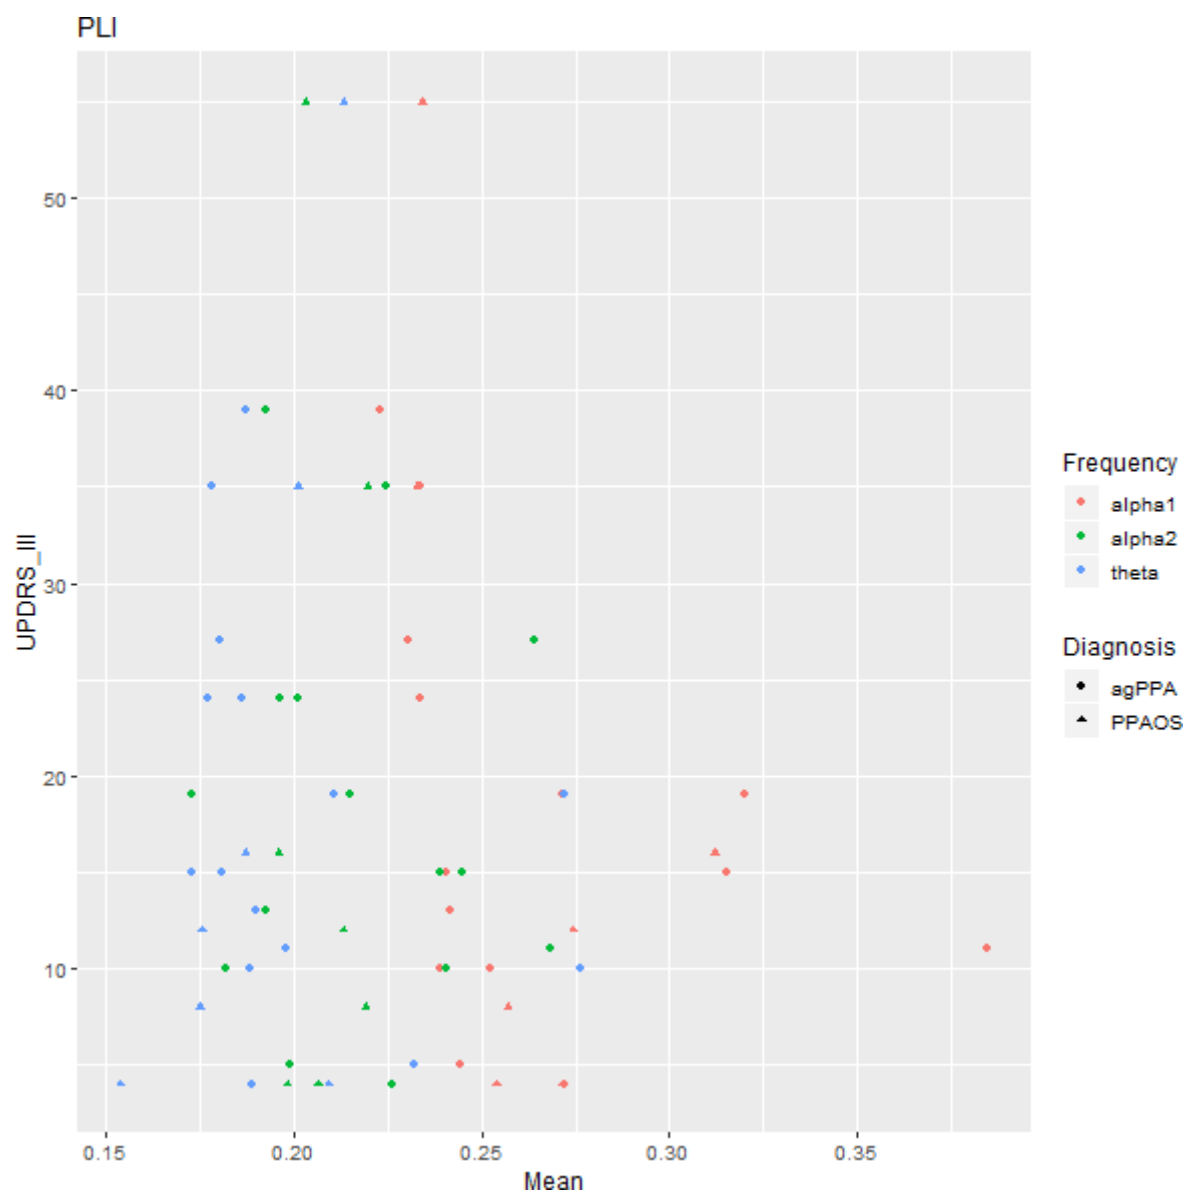

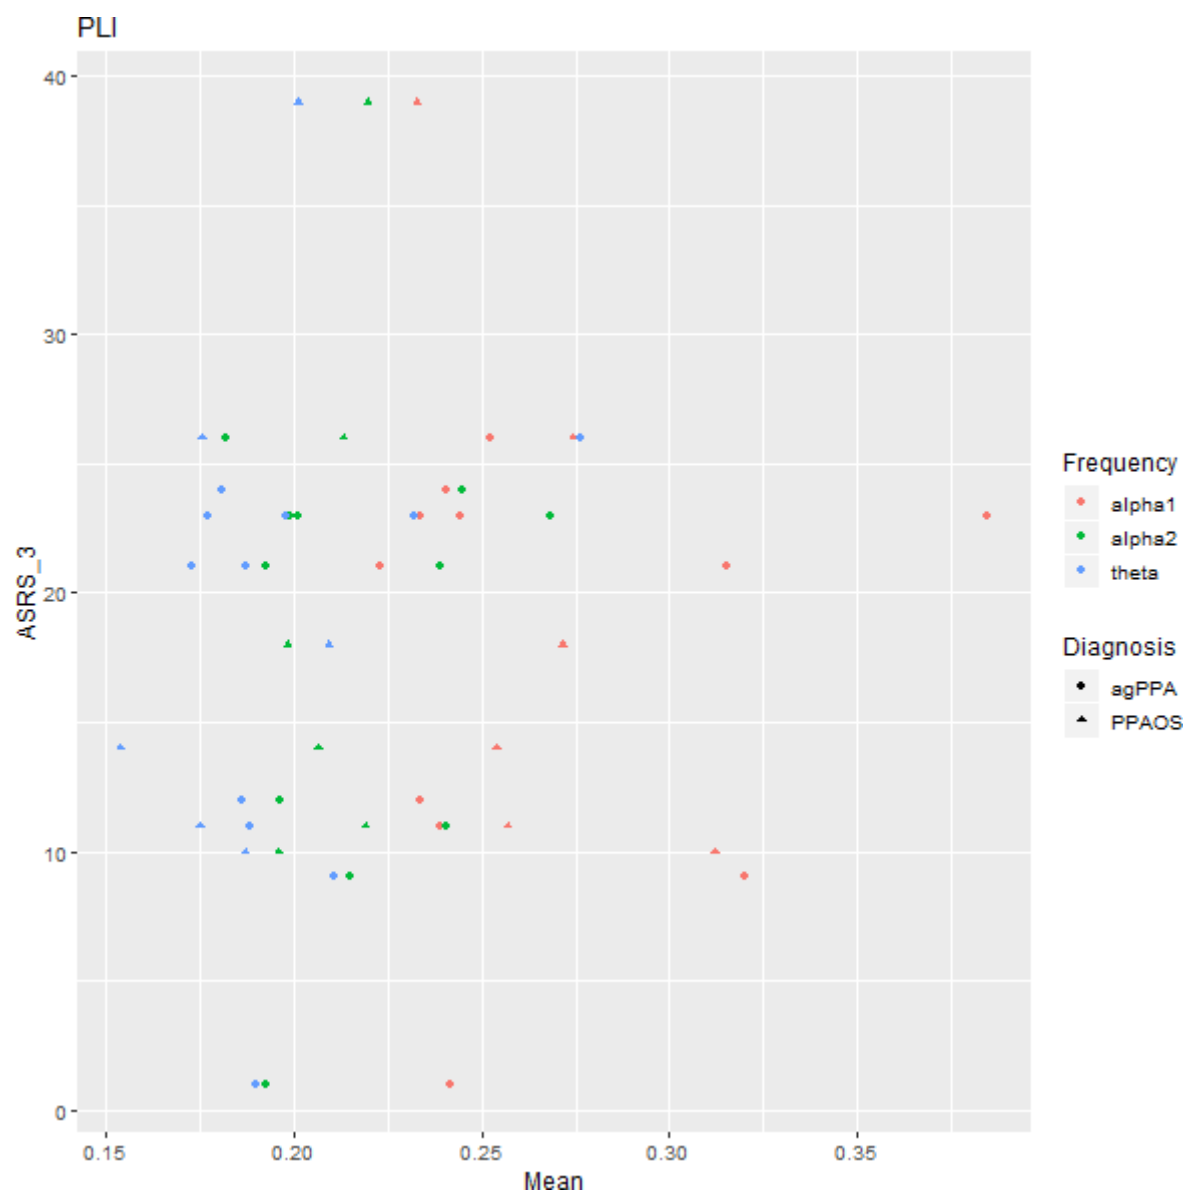

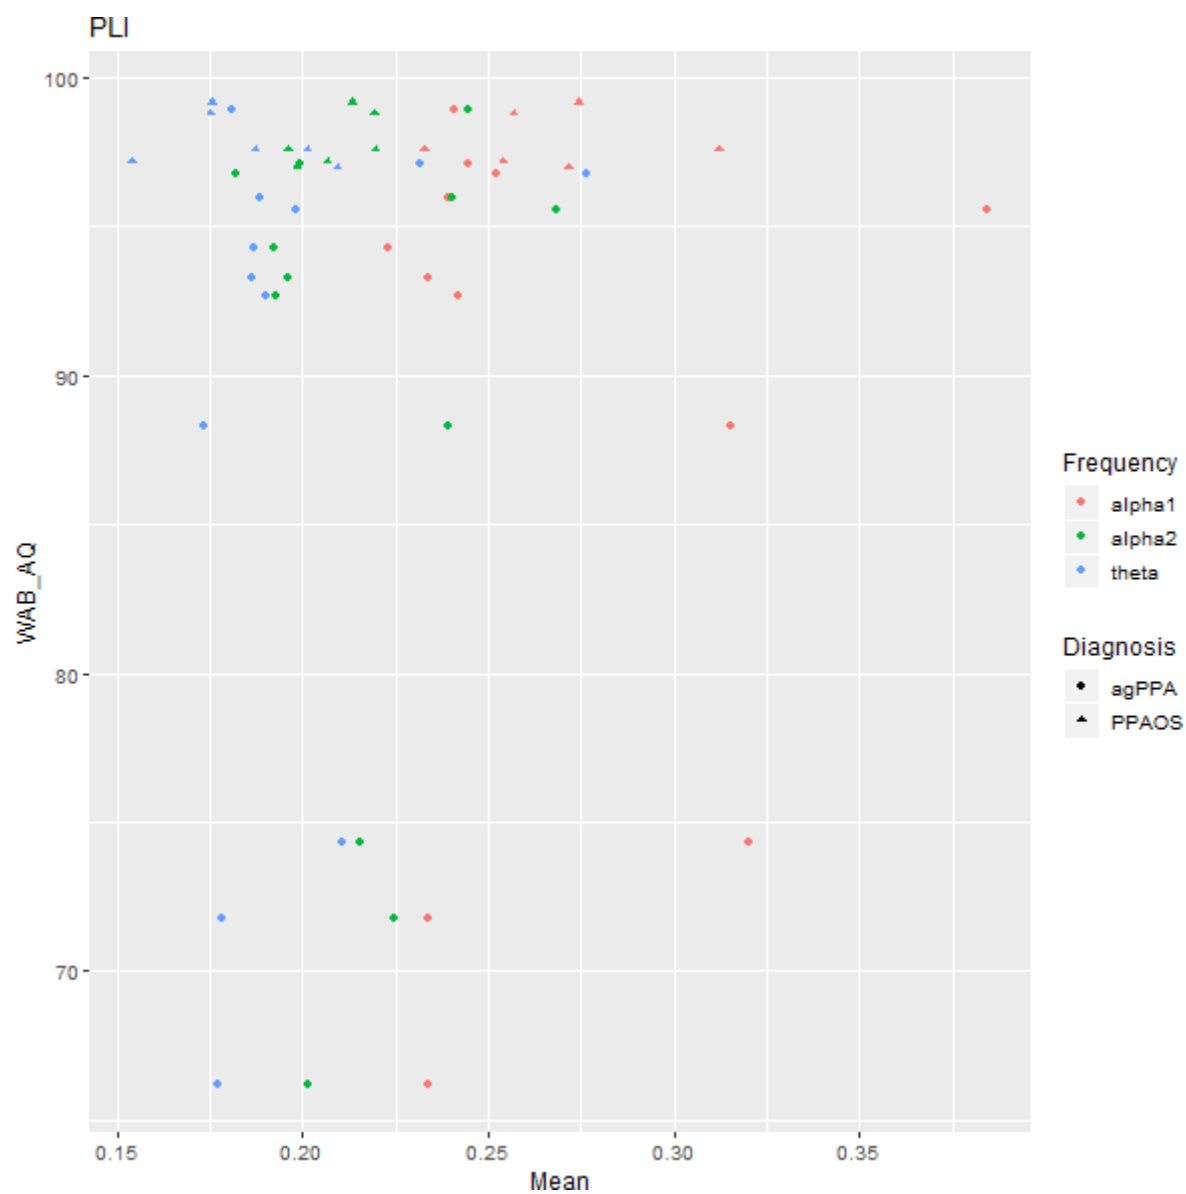

Gamma

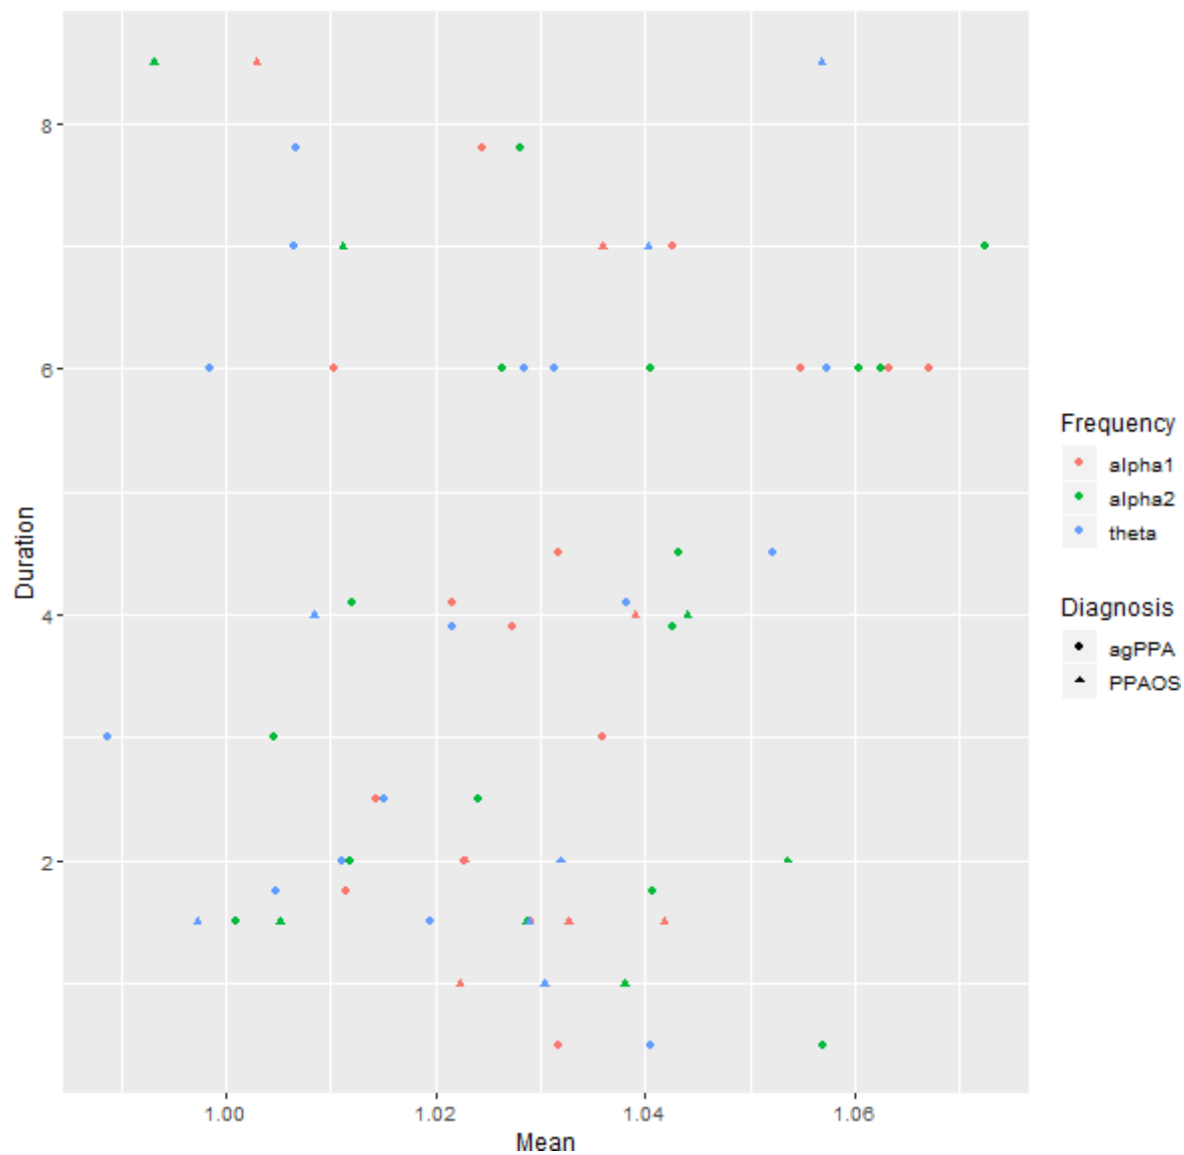

Gamma

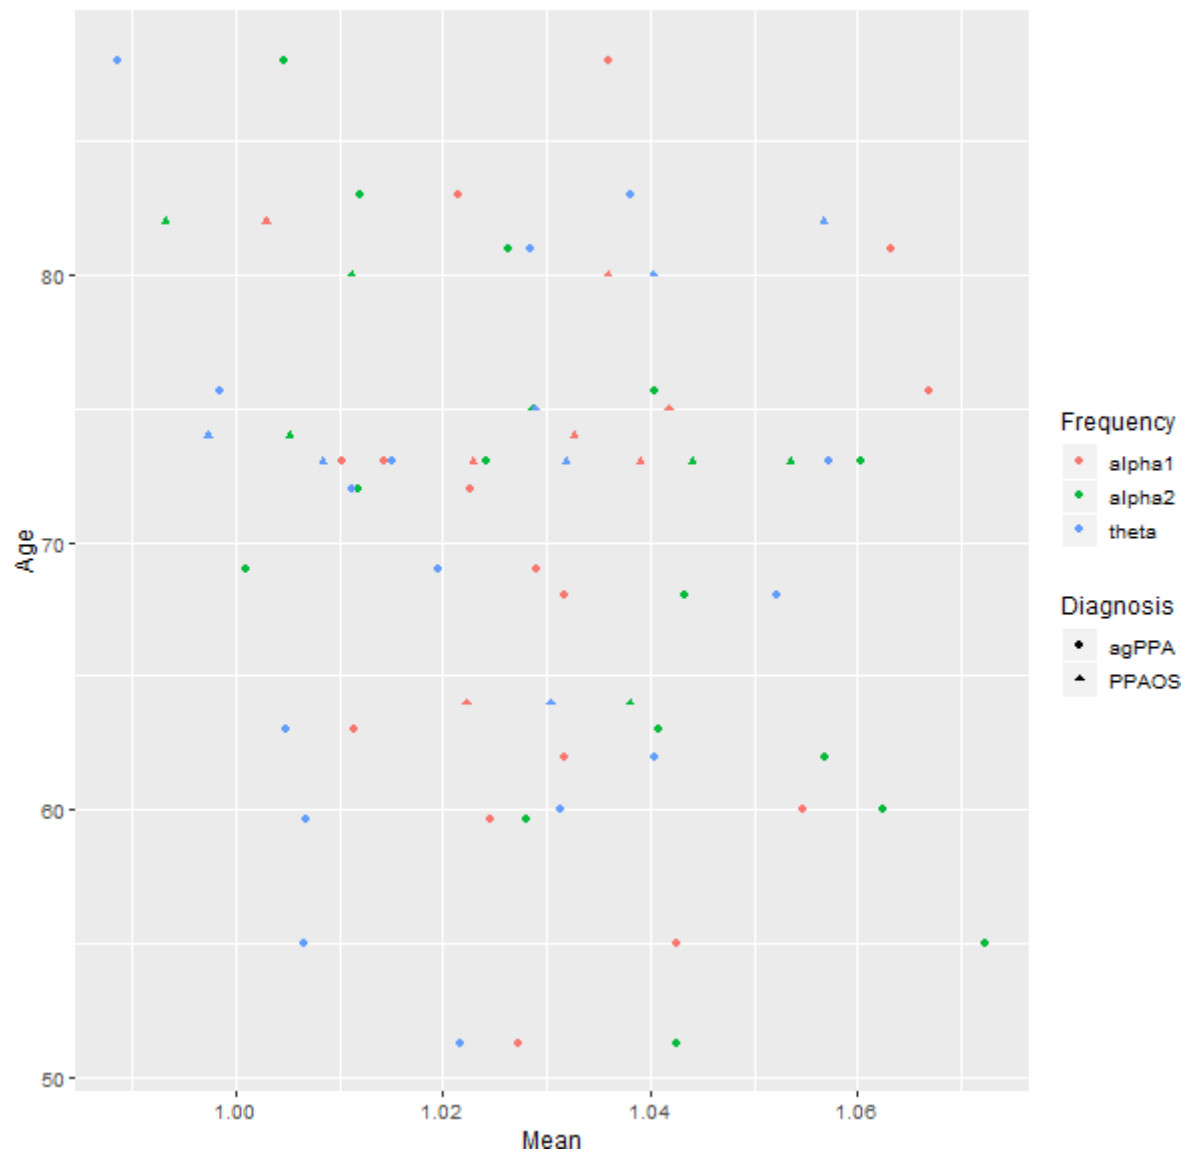

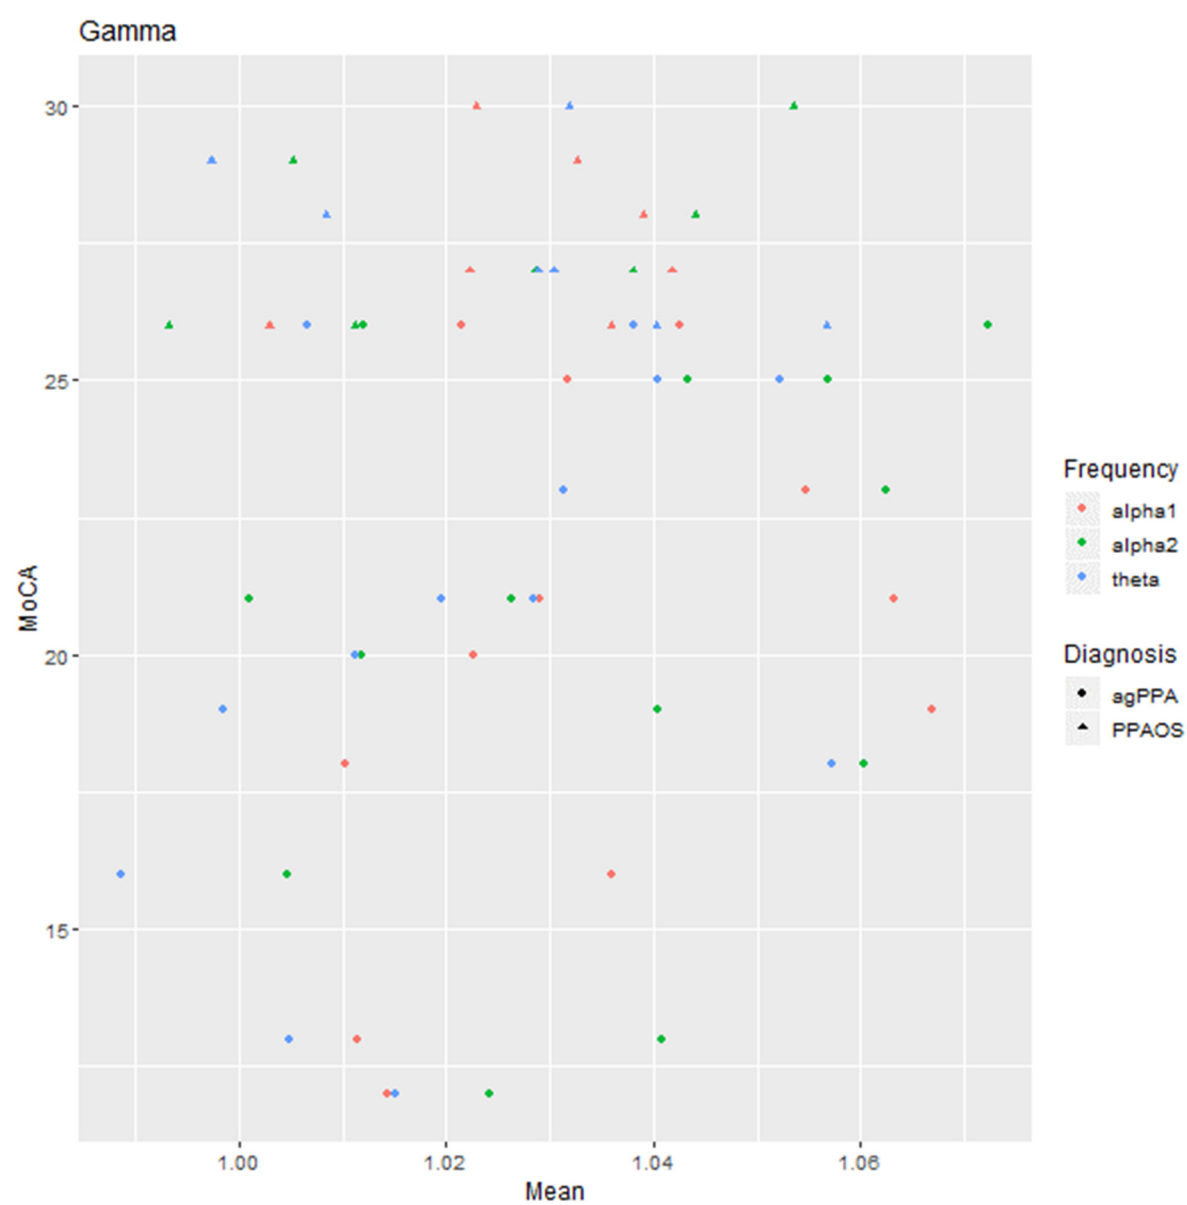

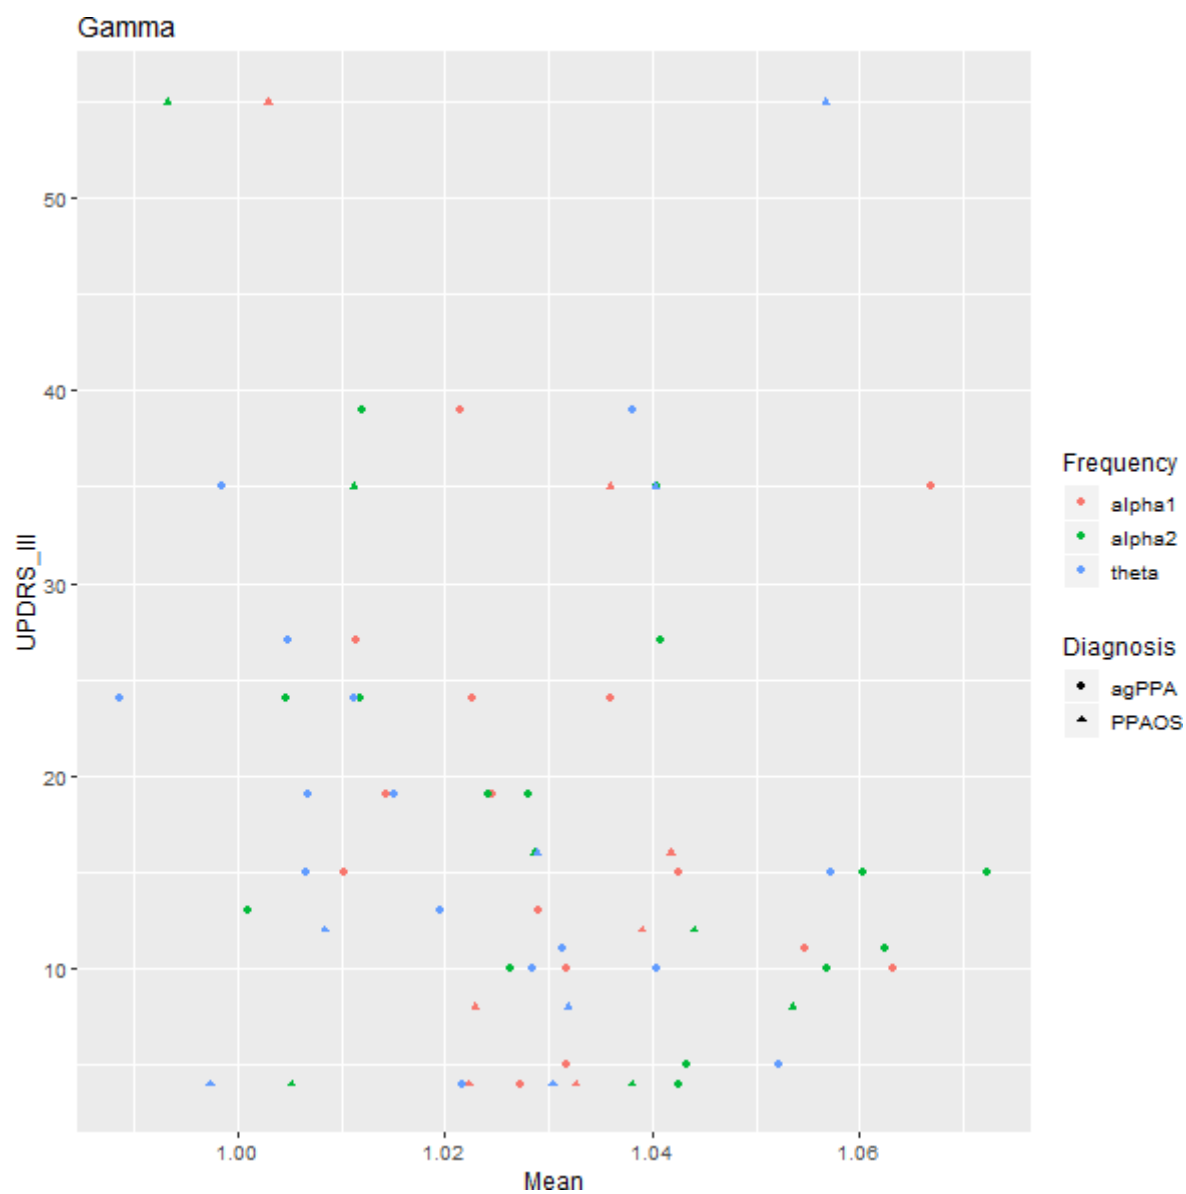

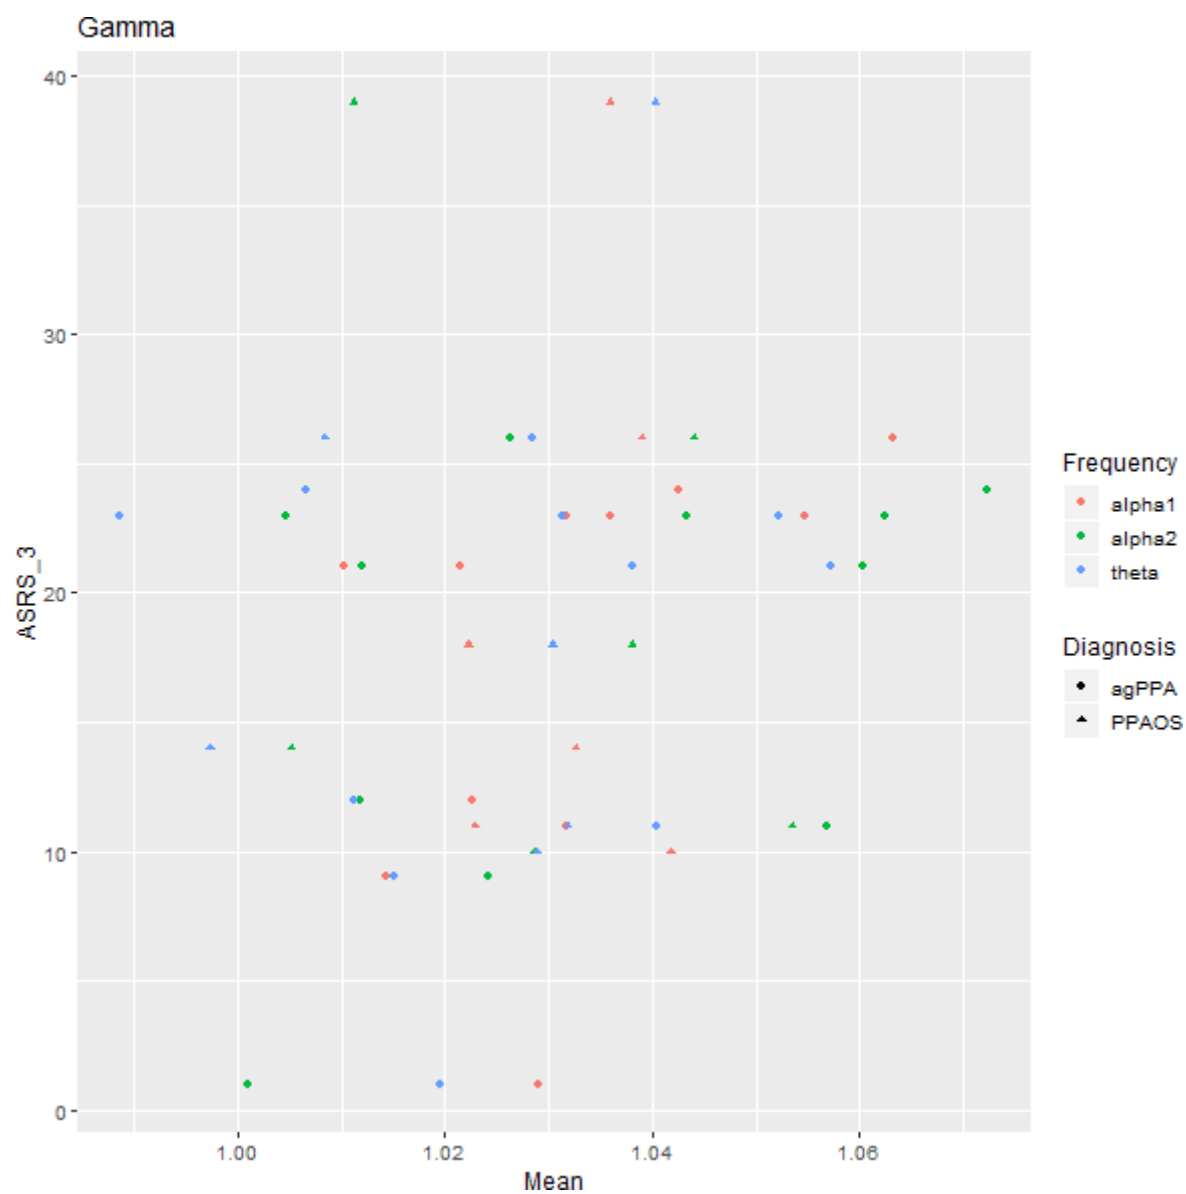

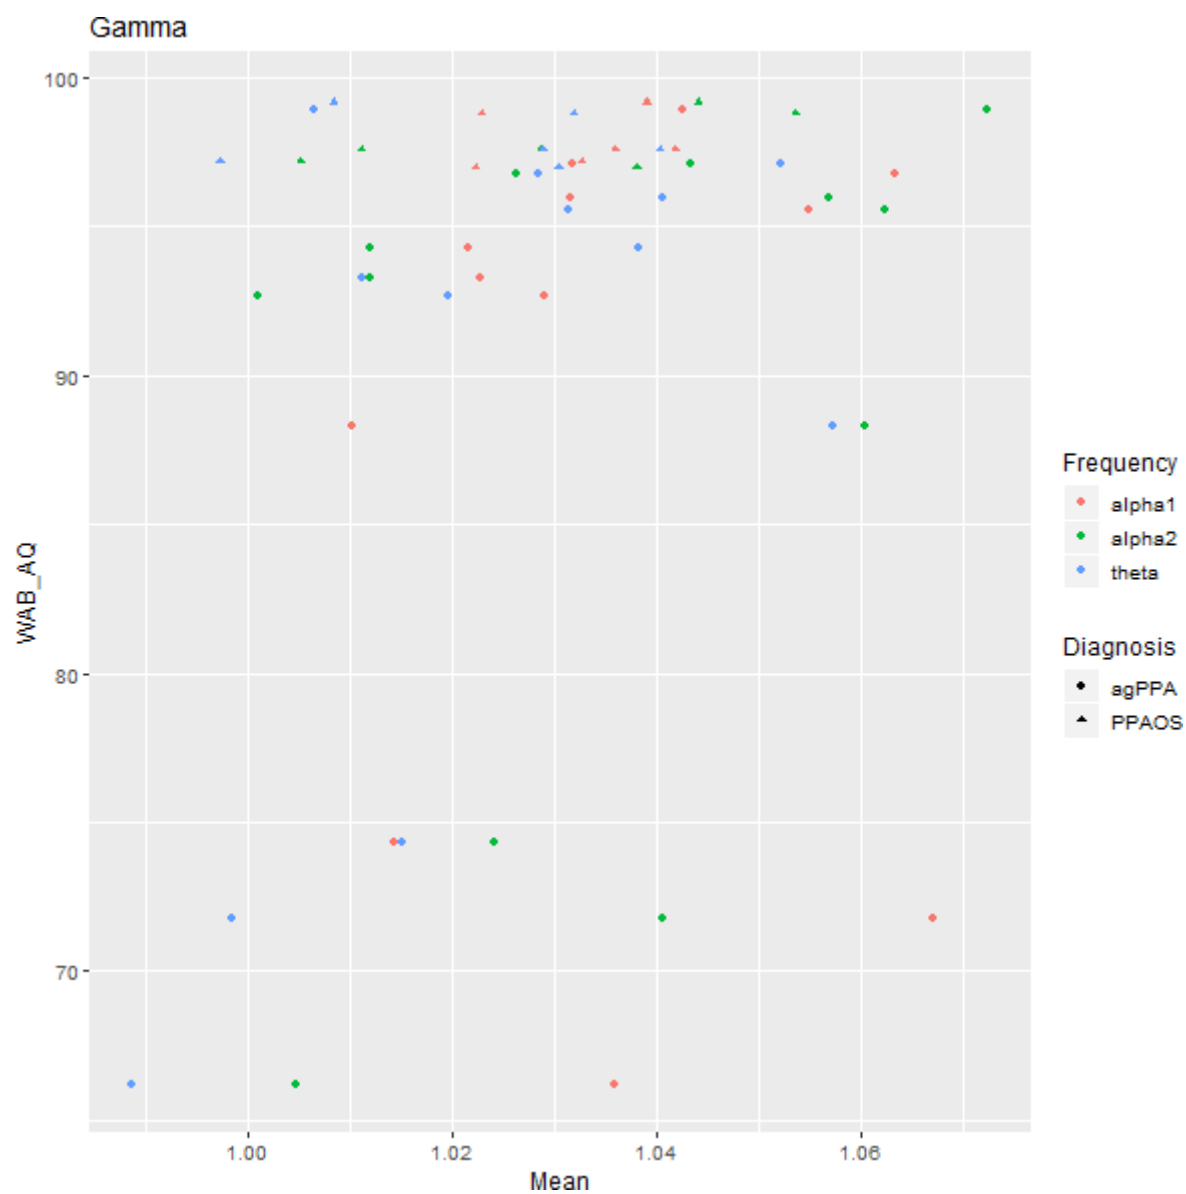

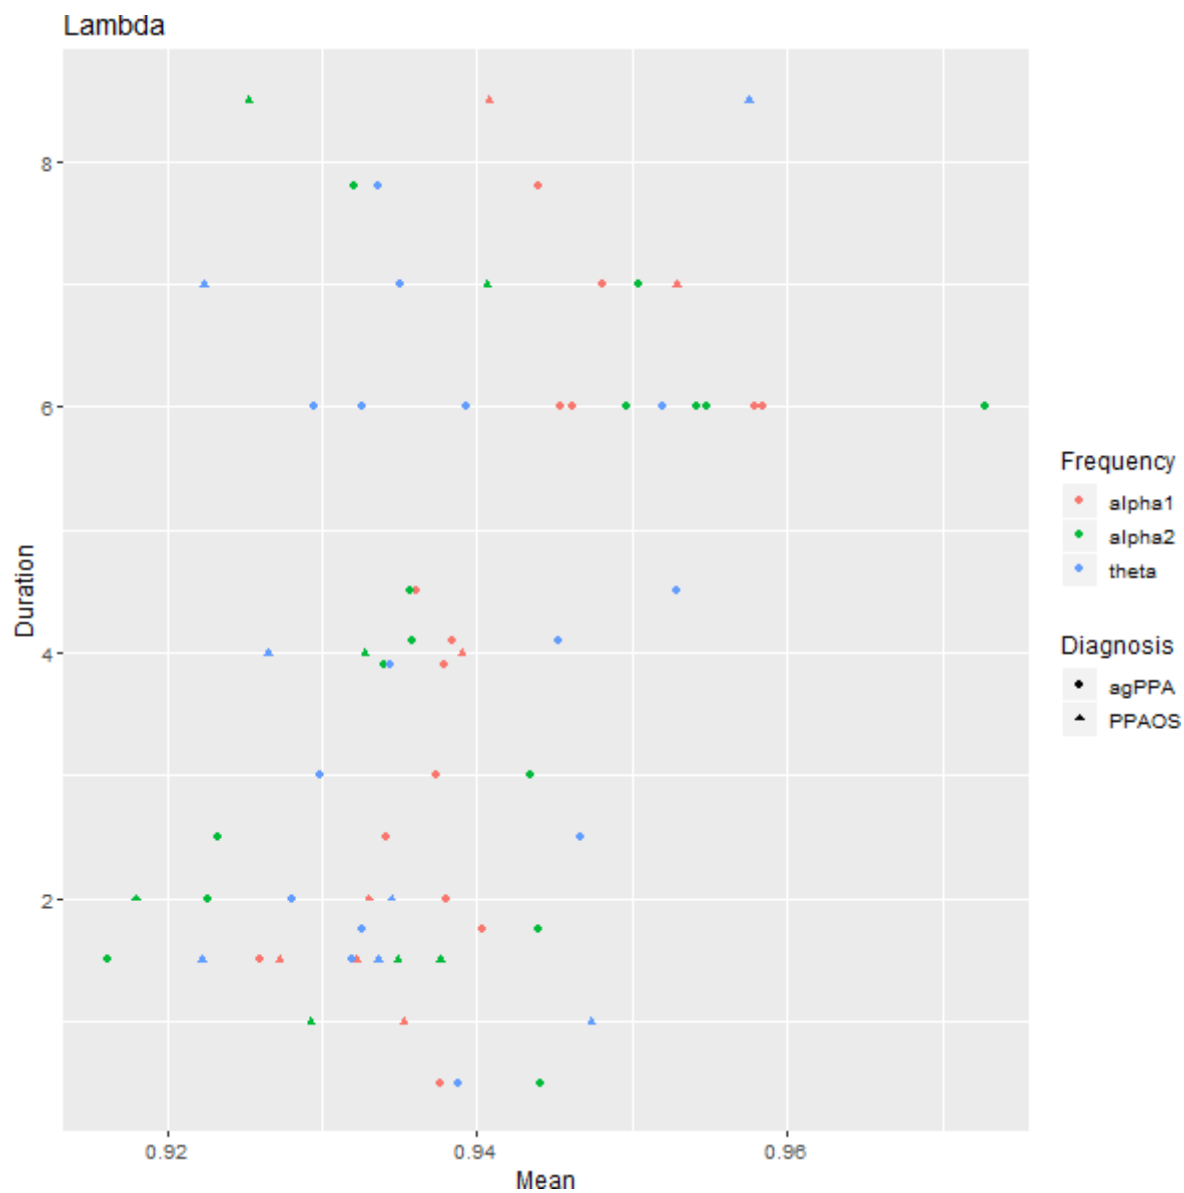

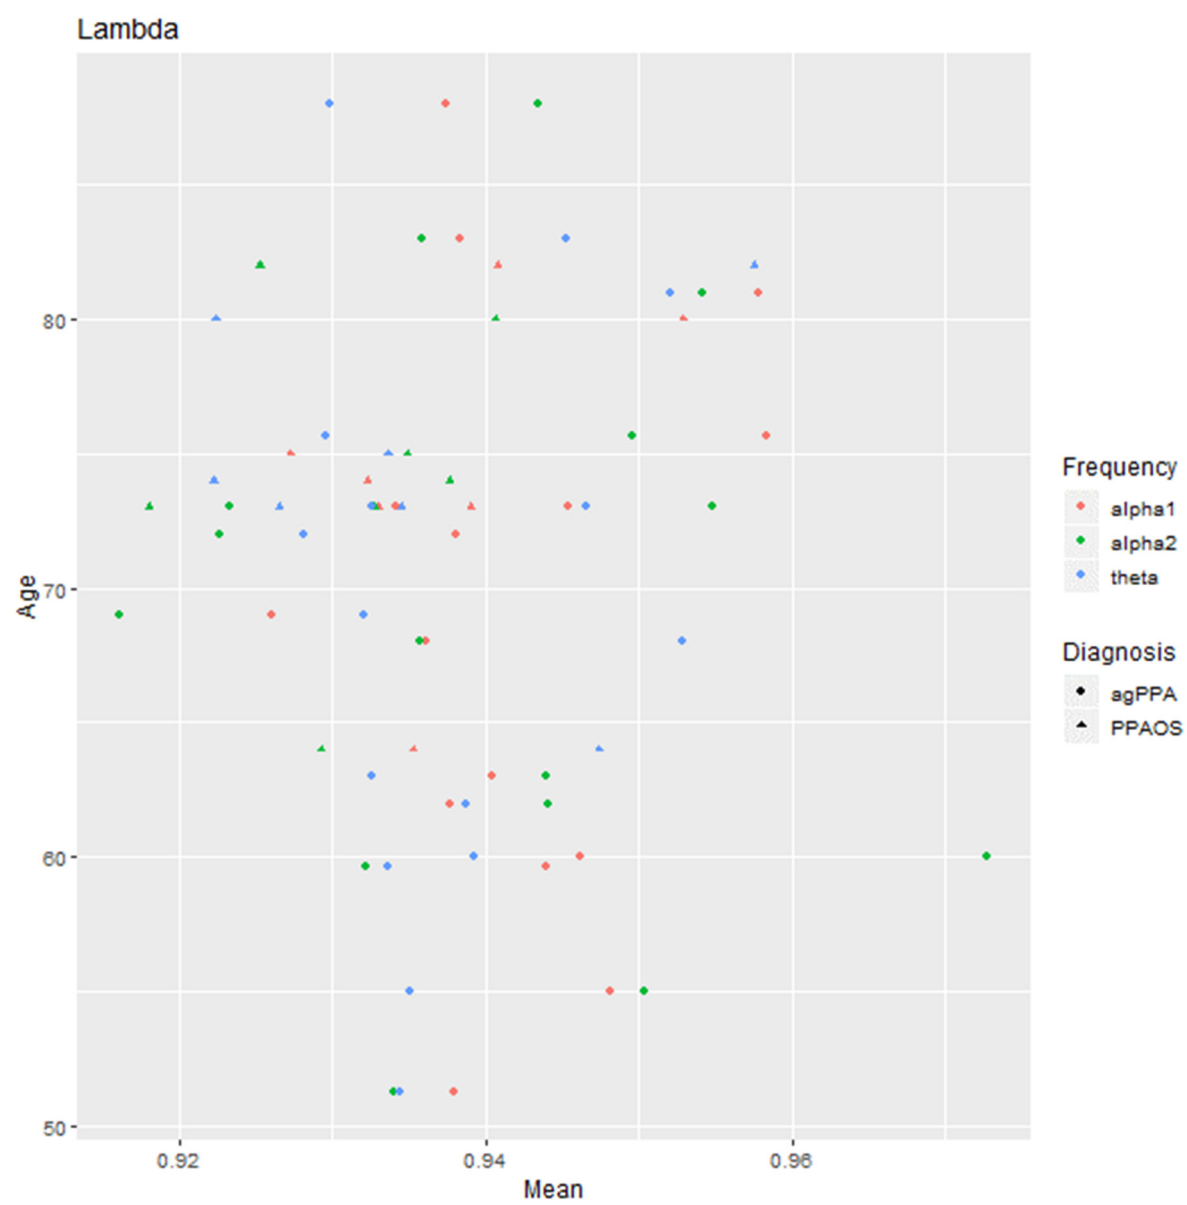

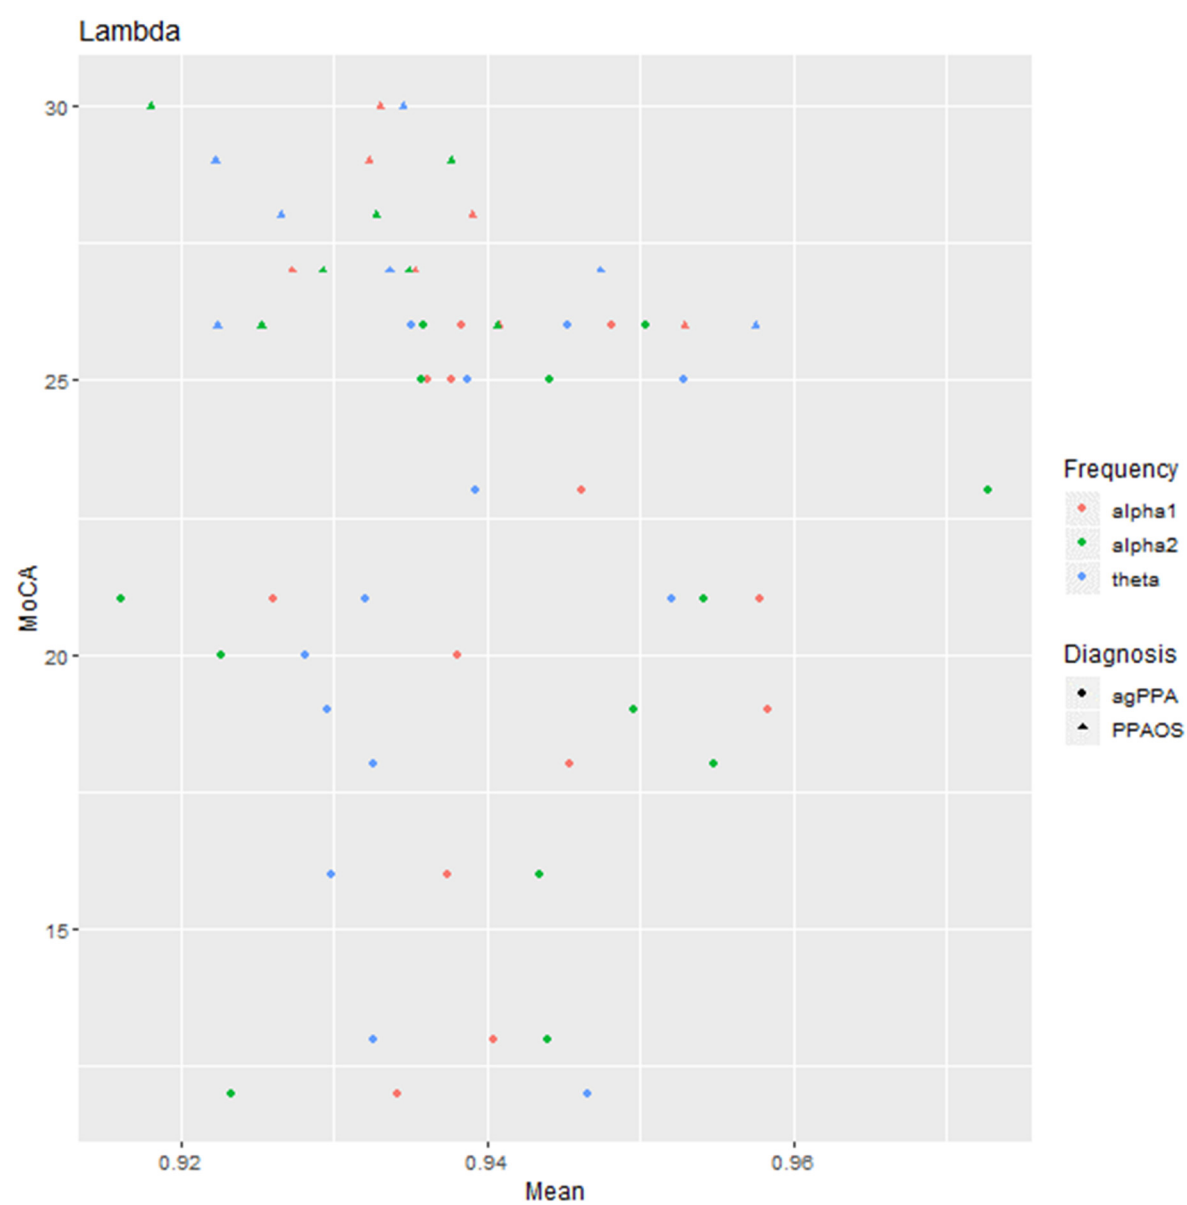

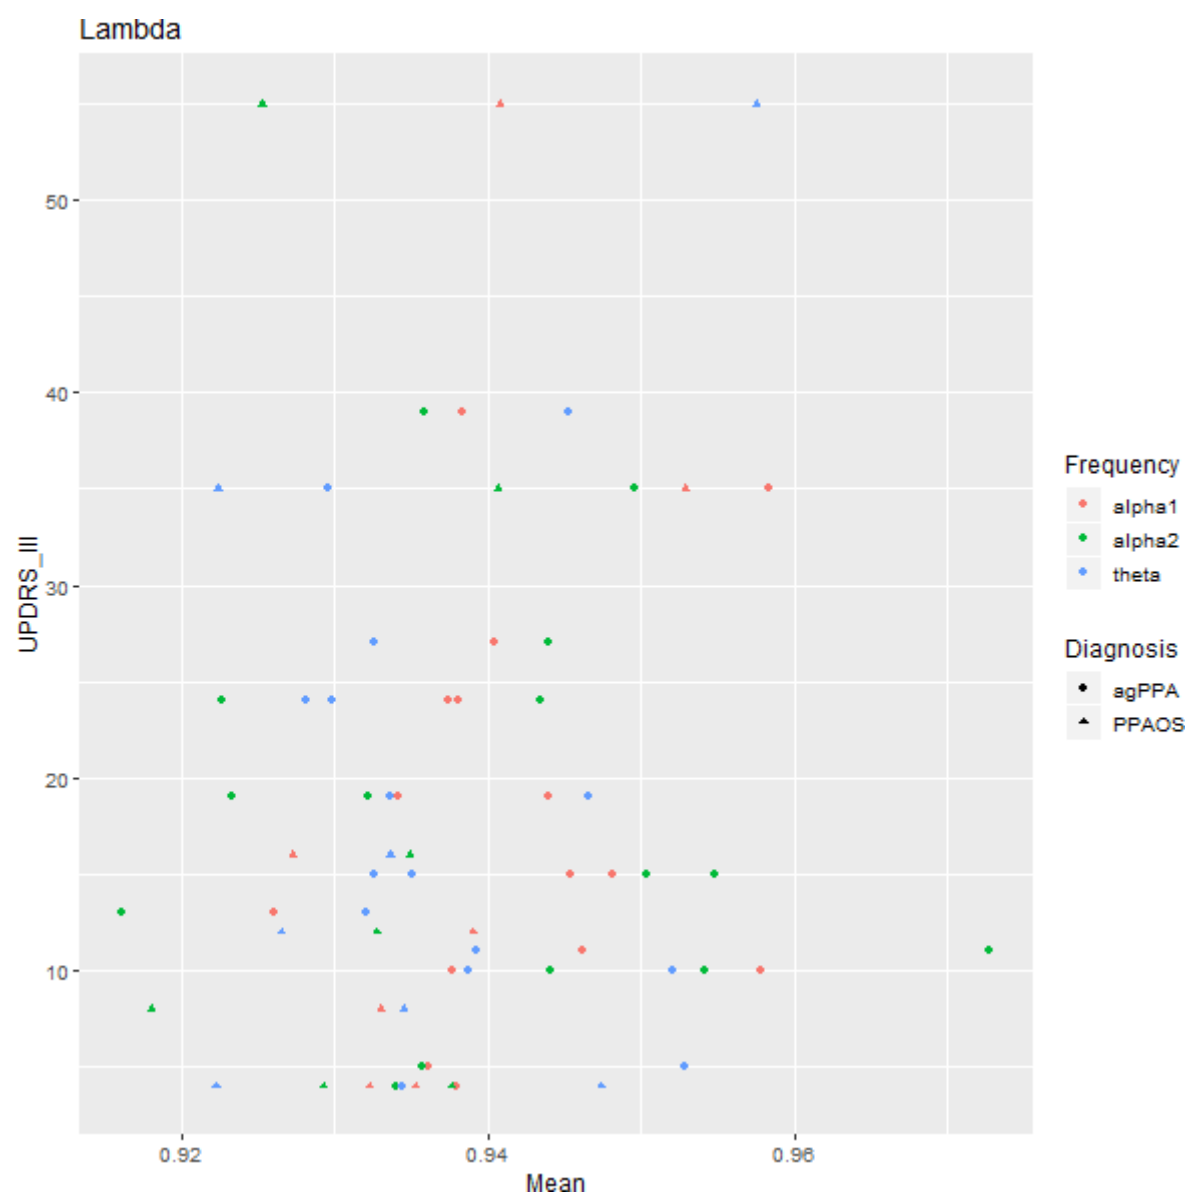

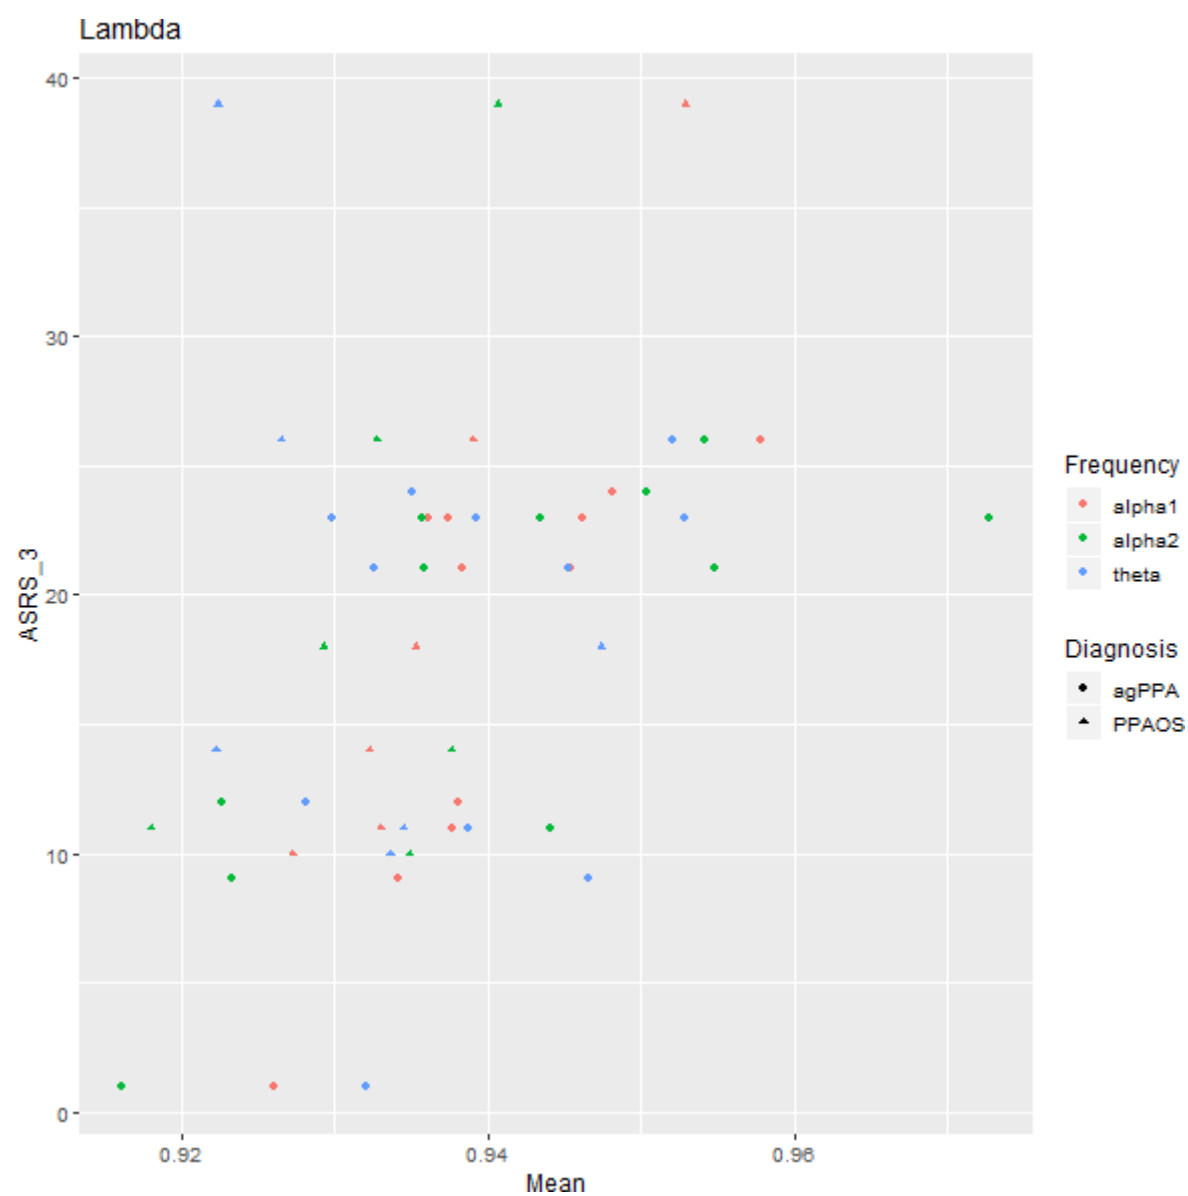

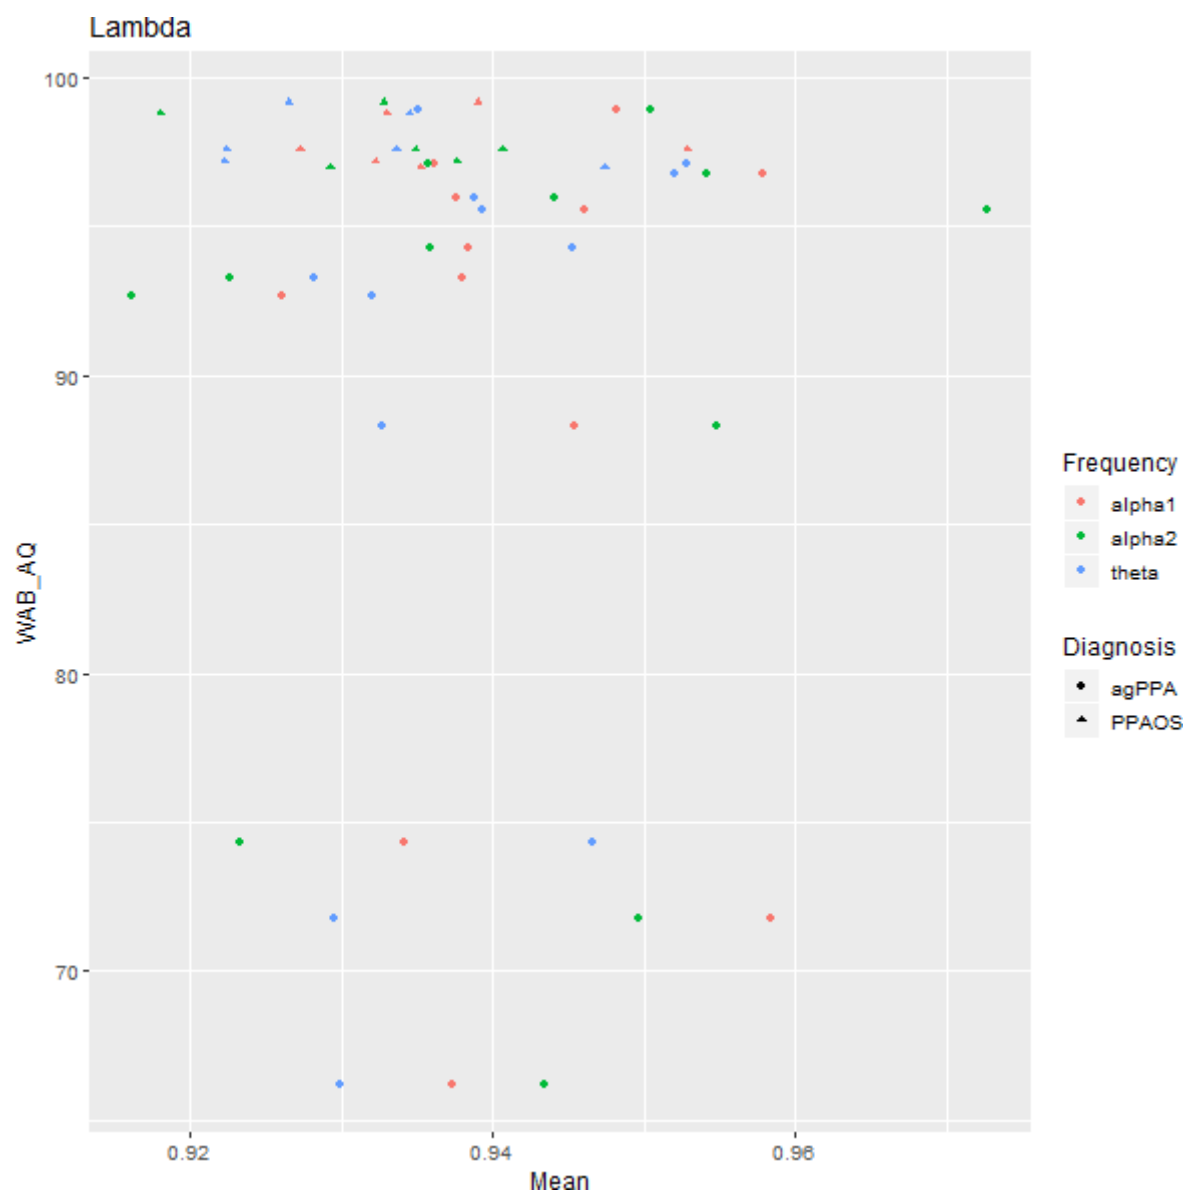



Kappaw

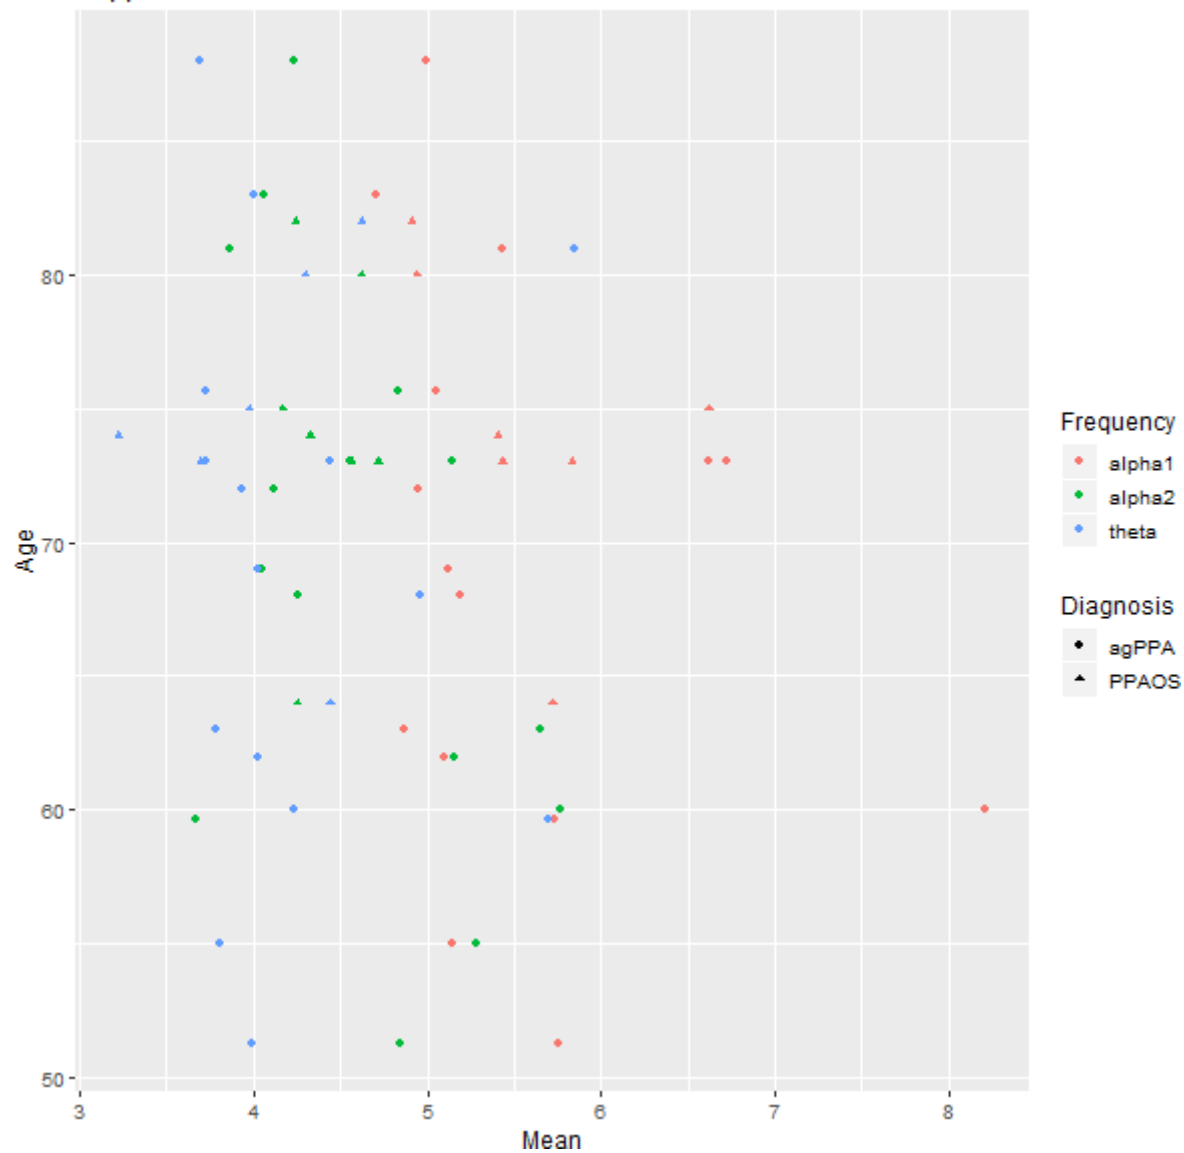

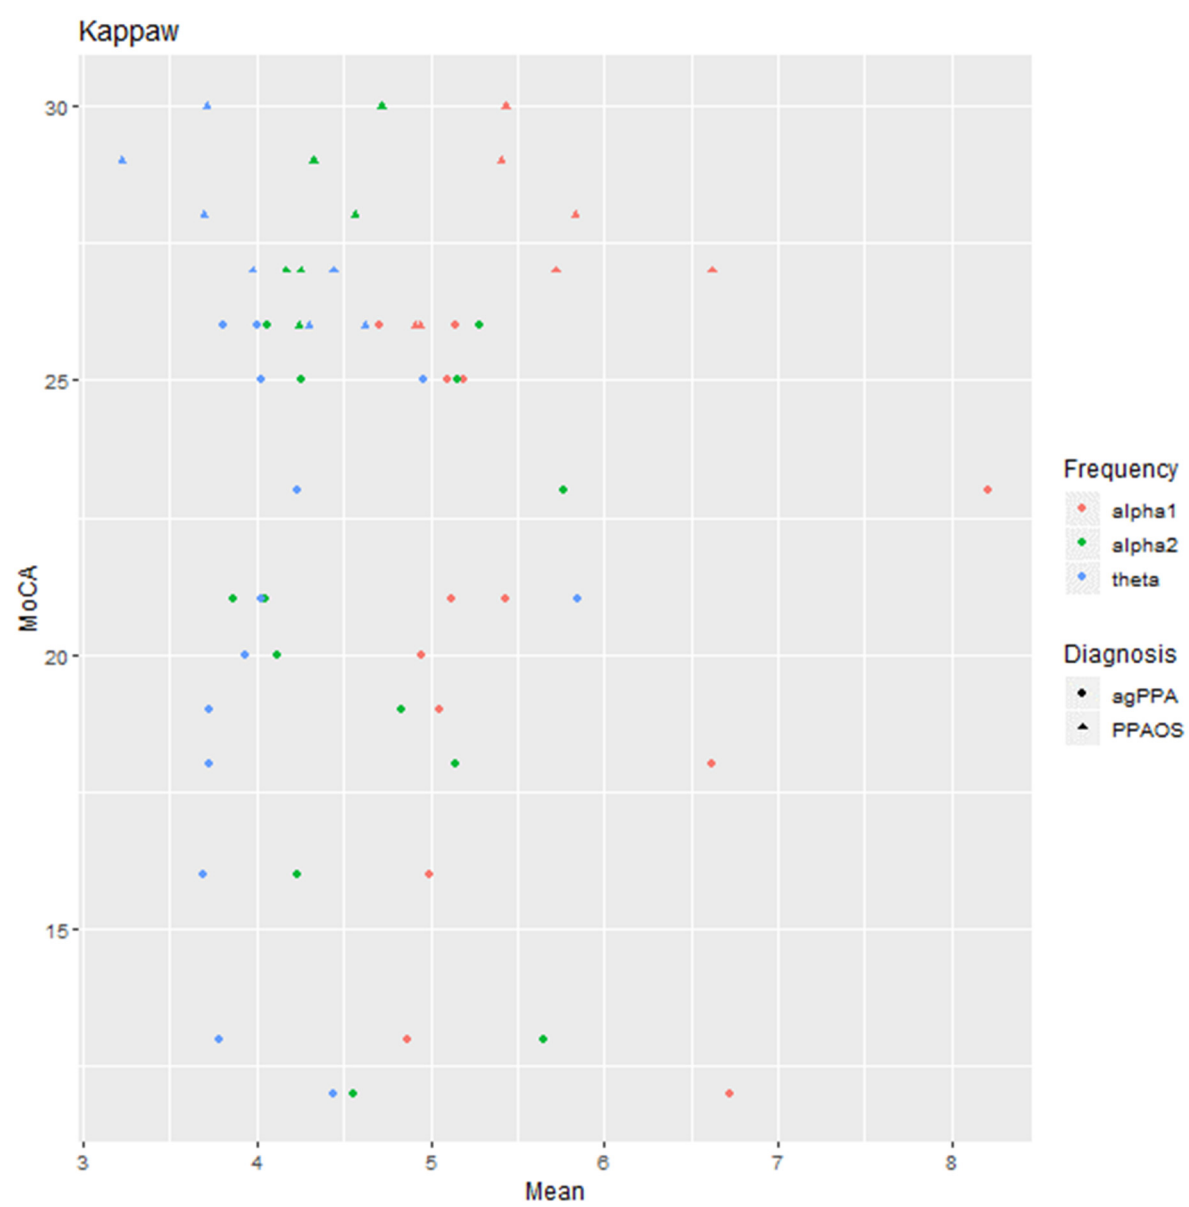

Kappaw

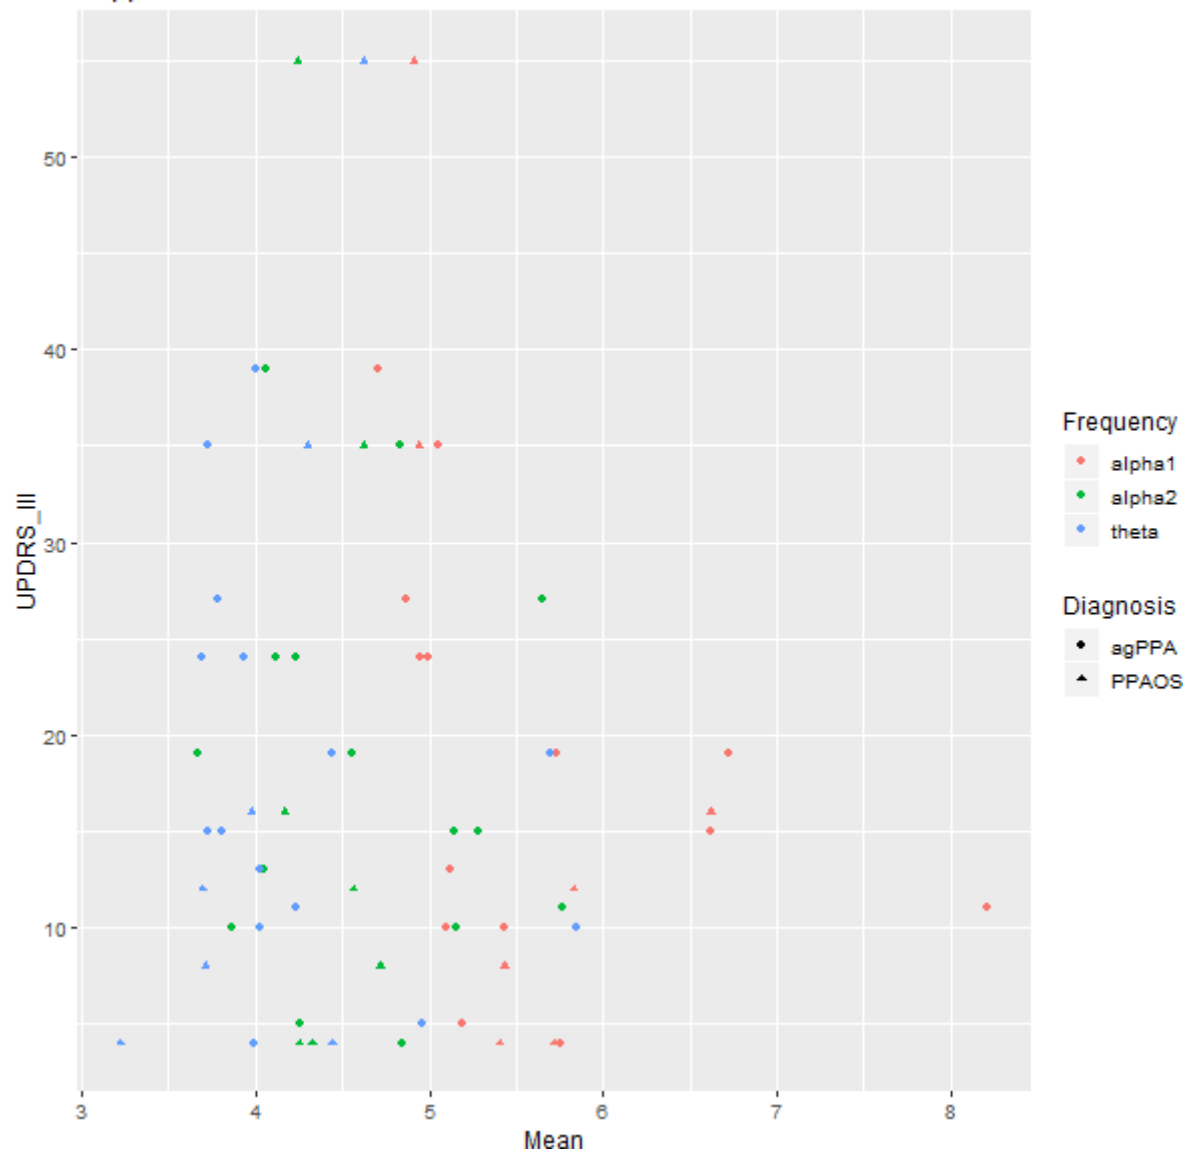

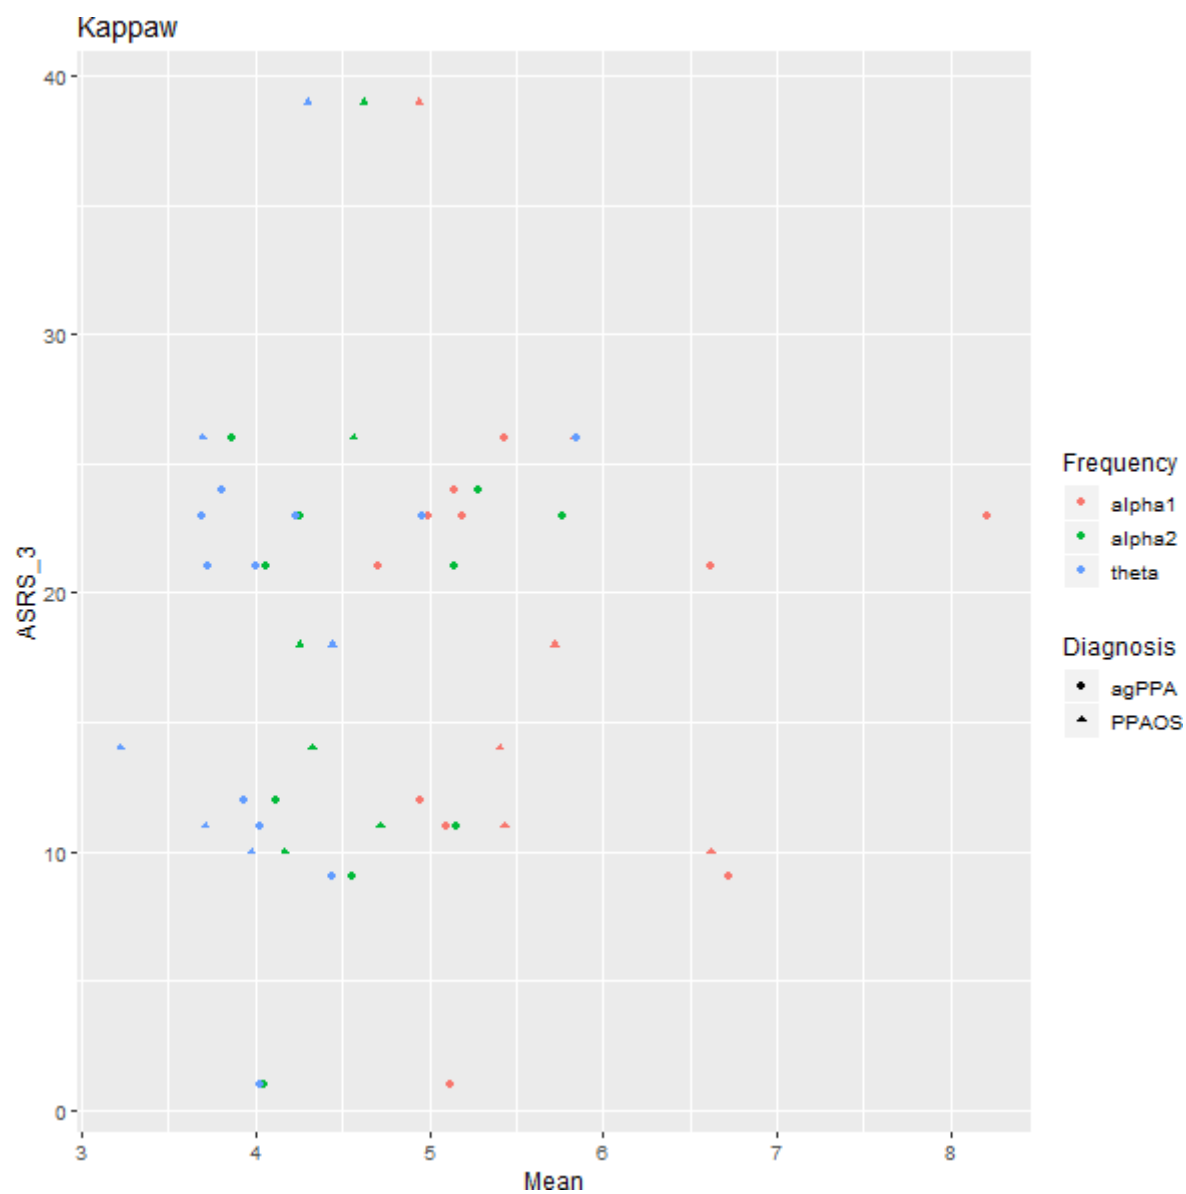

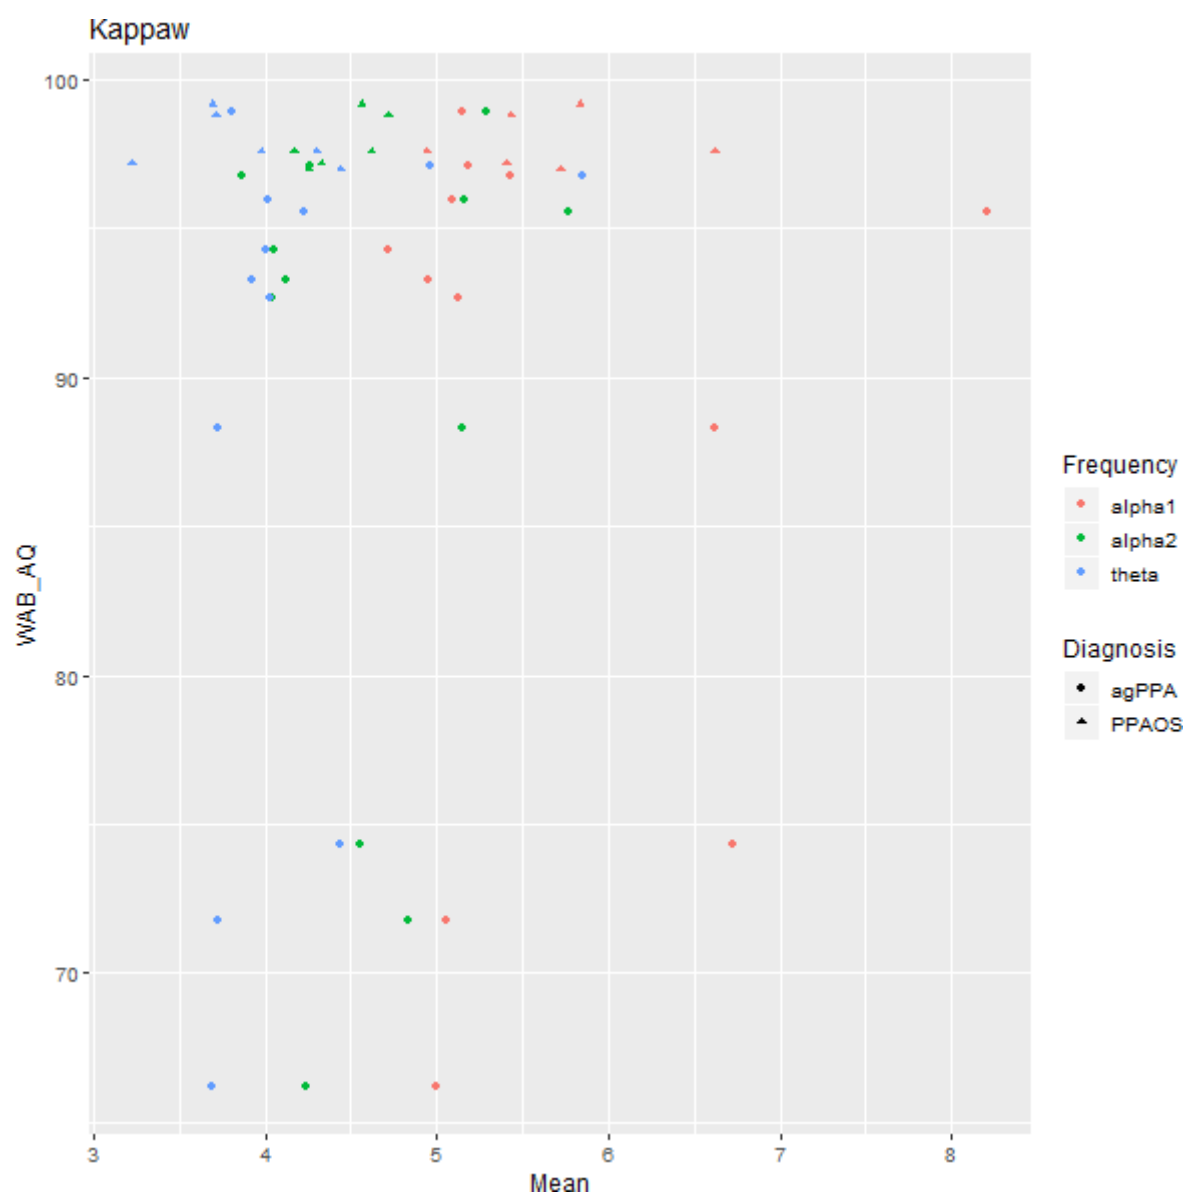

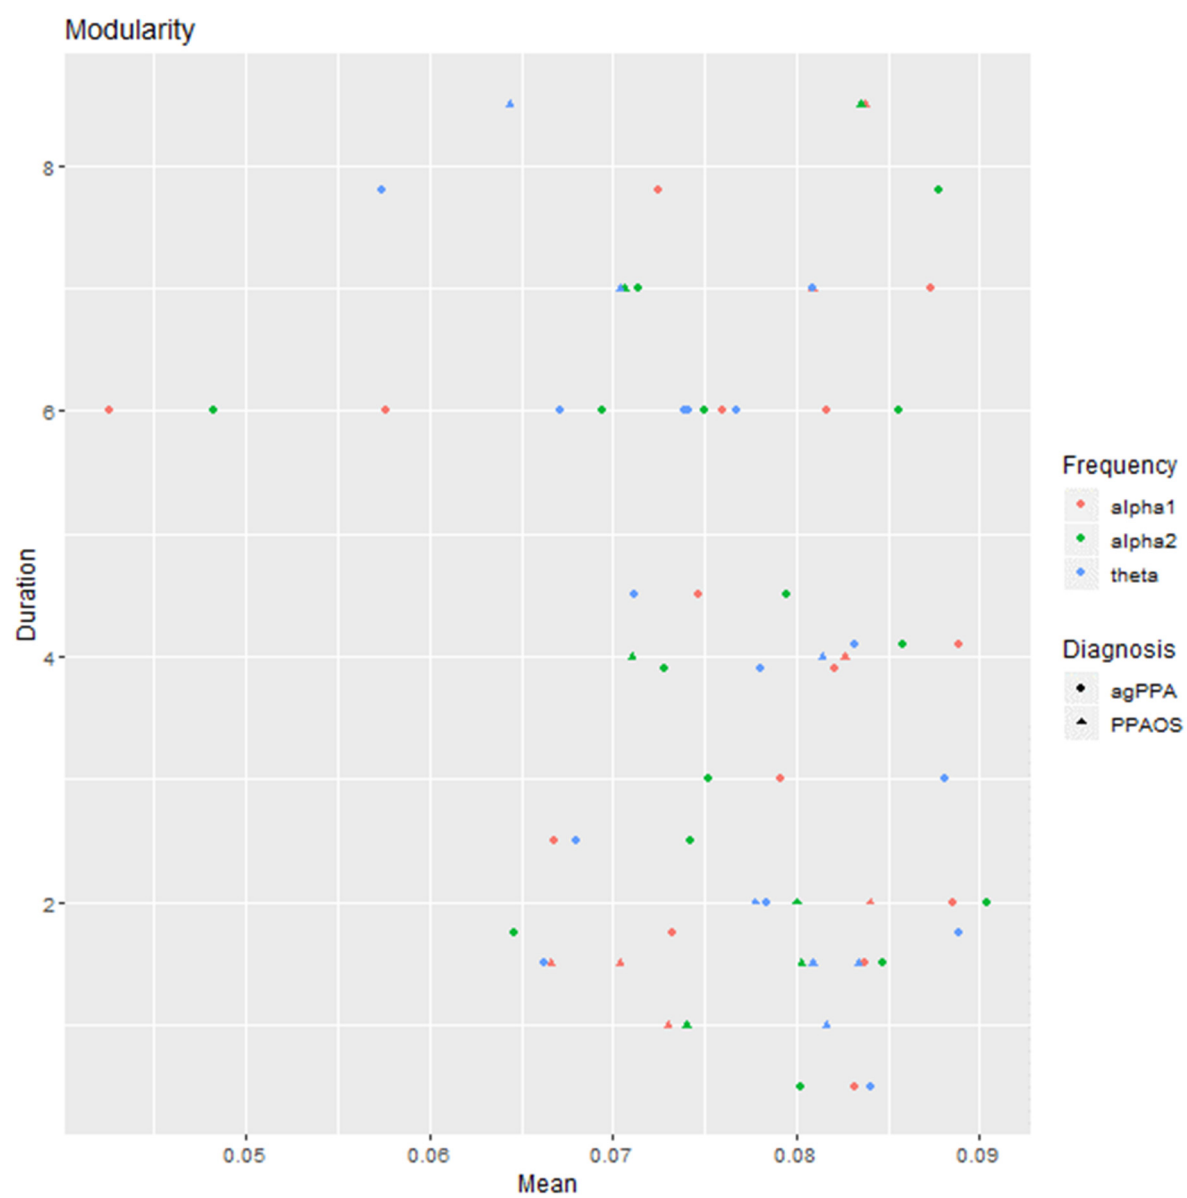

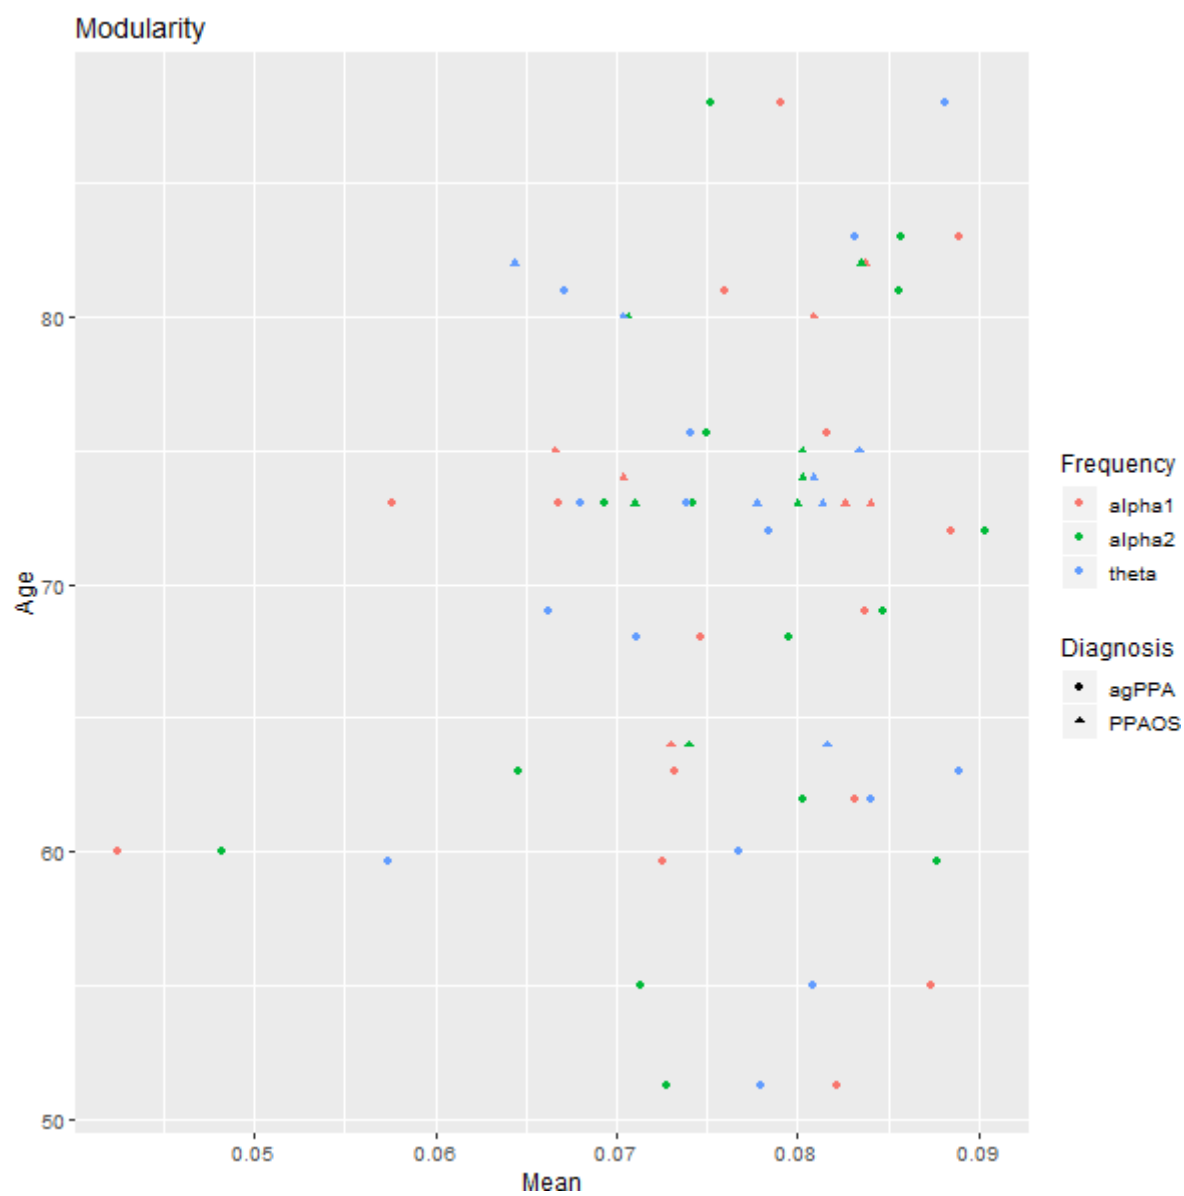

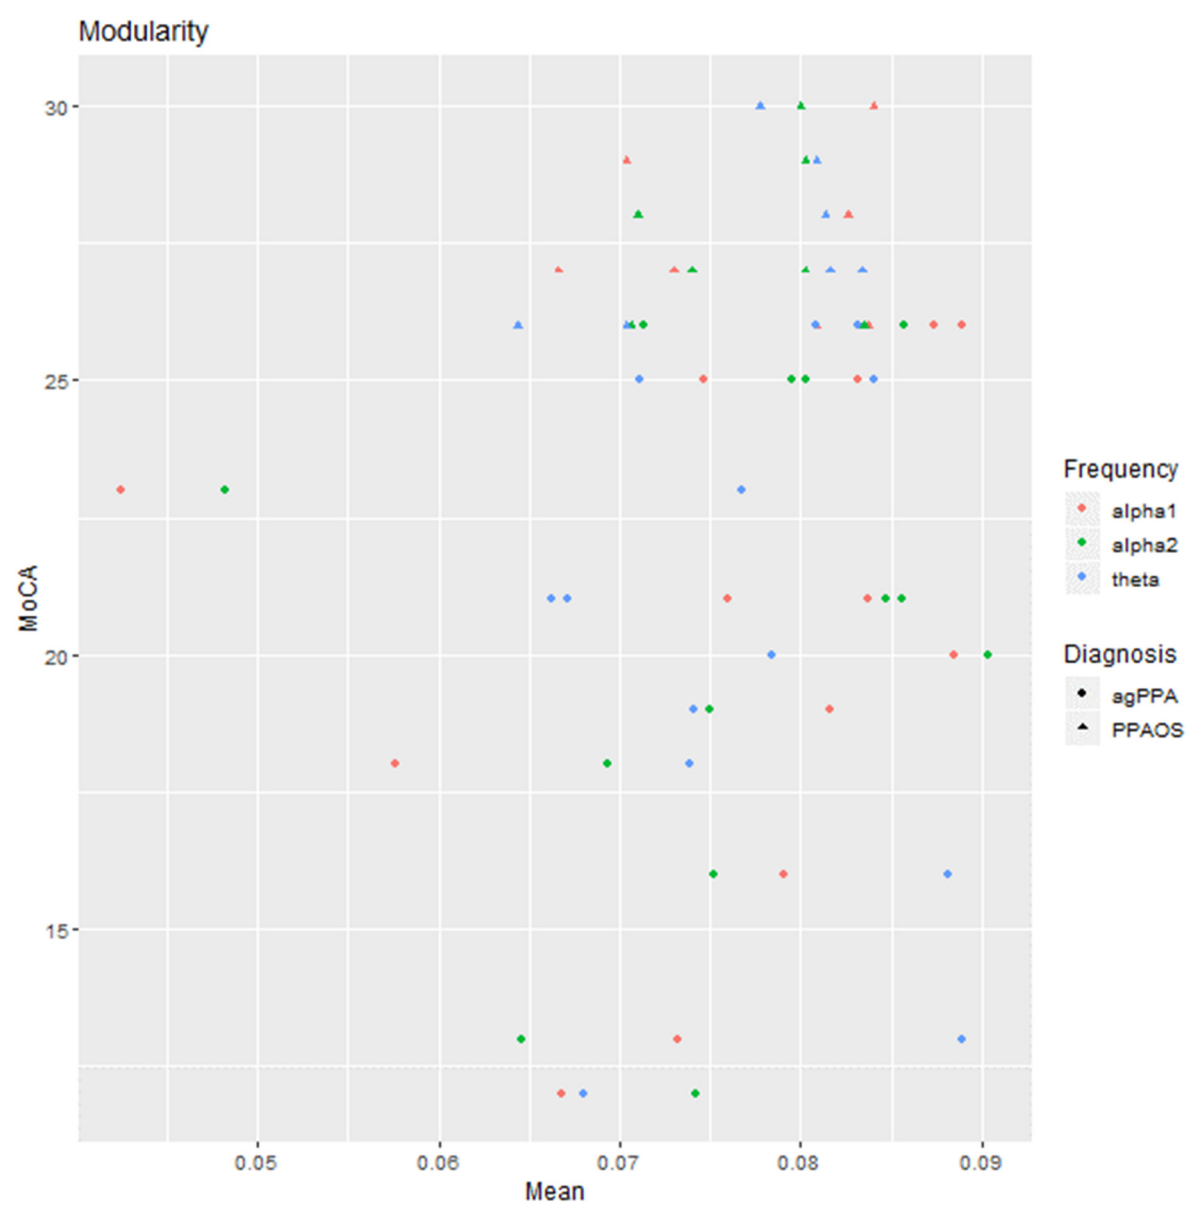

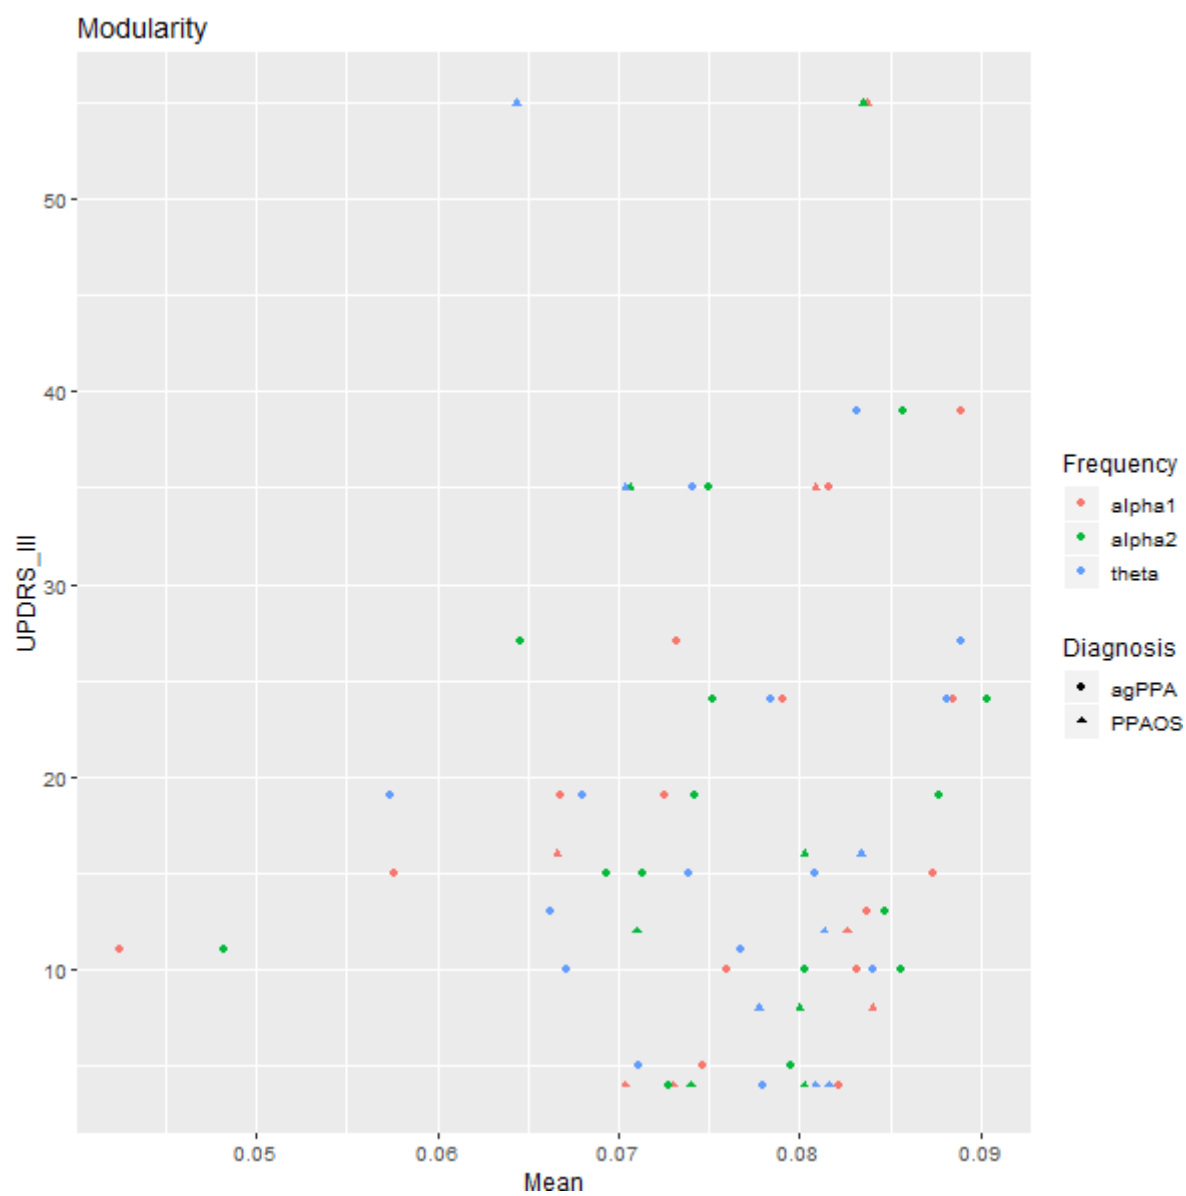

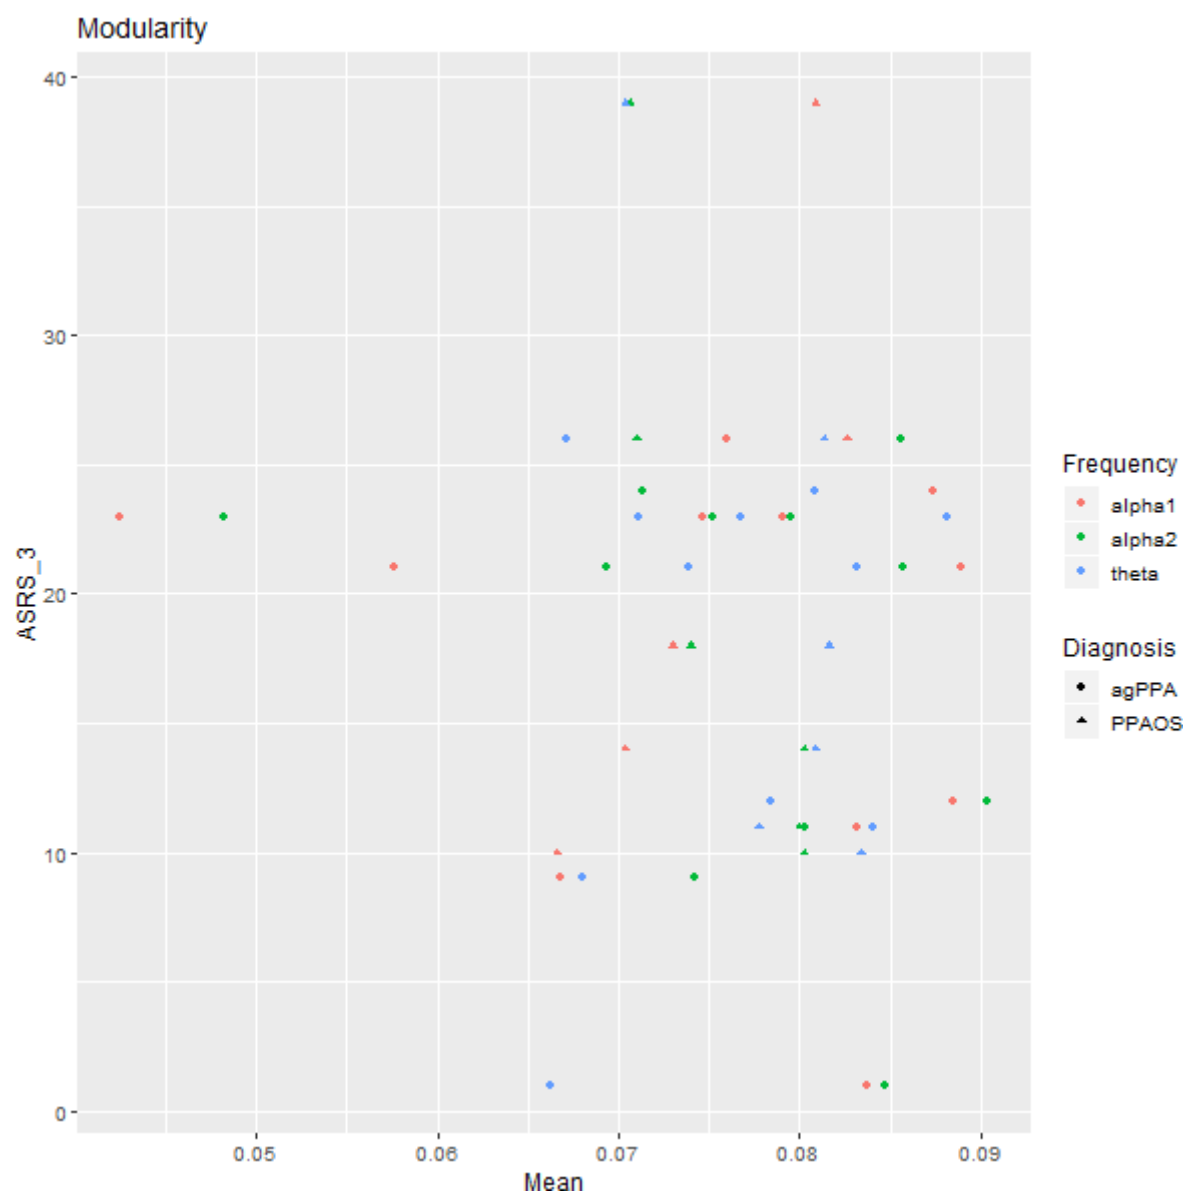

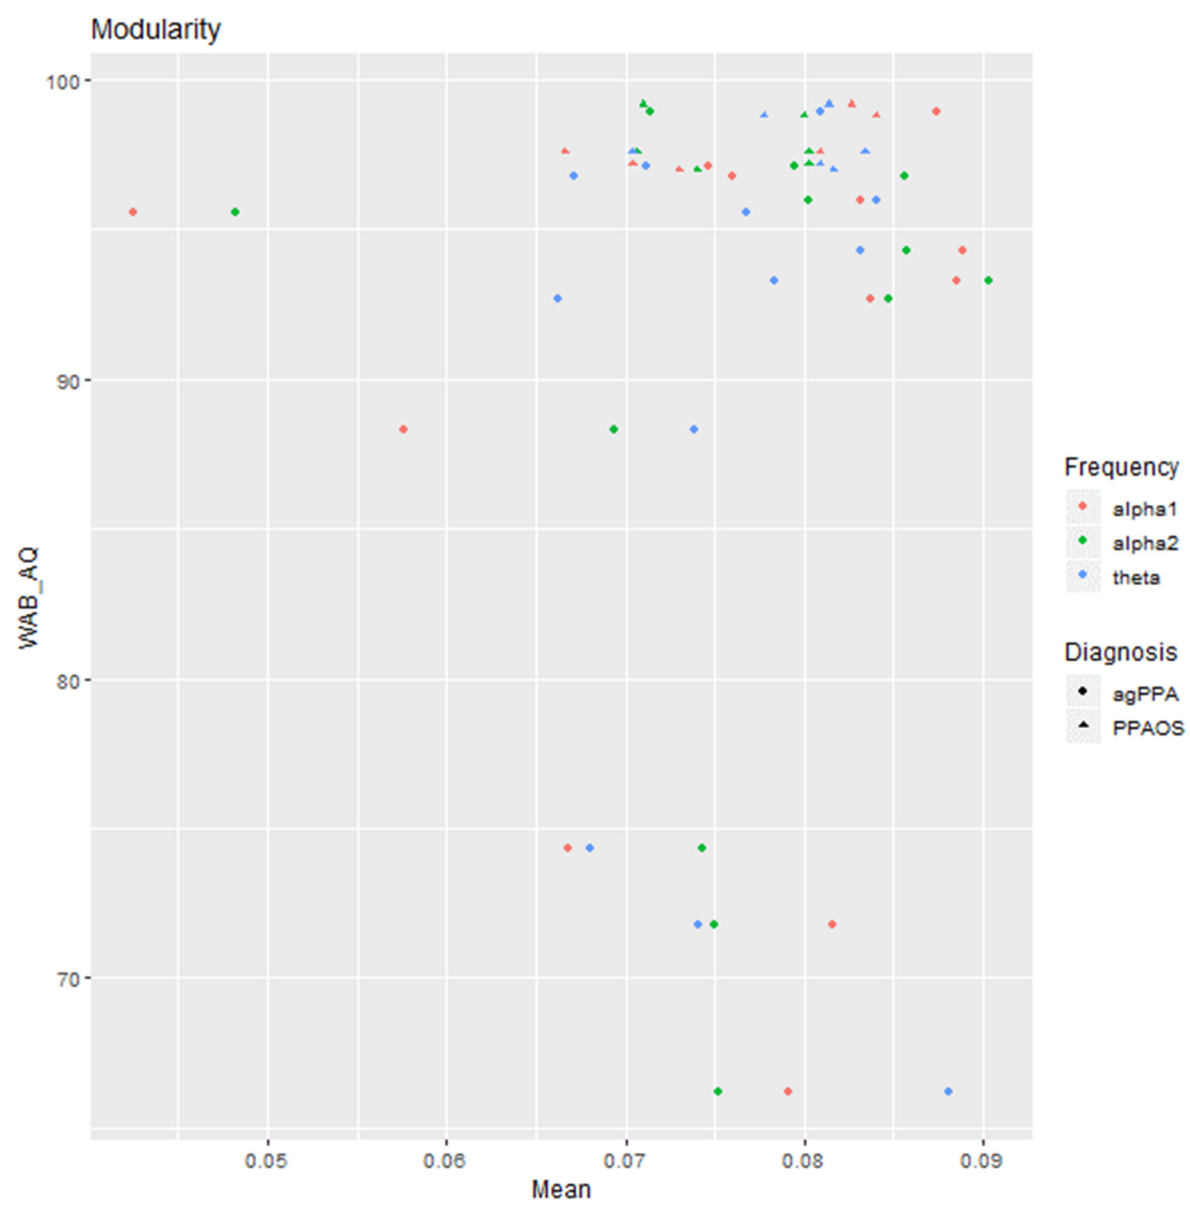

Supplement: Supplementary file 1 [file brainsci-12-00378-s001.zip › brainsci-1594846-supplementary.pdf]
